# Supplementary material
Source: PubMed Central journal article supplement (PMC4207863)
Supplement: supp_ssu079_VIM123_Supplemental_data_source.pdf [file supp_ssu079_VIM123_Supplemental_data_source.pdf]

**Supplemental Figure 1. Relationship between DNA methylation and transcriptional activation in *vim1/2/3*.**

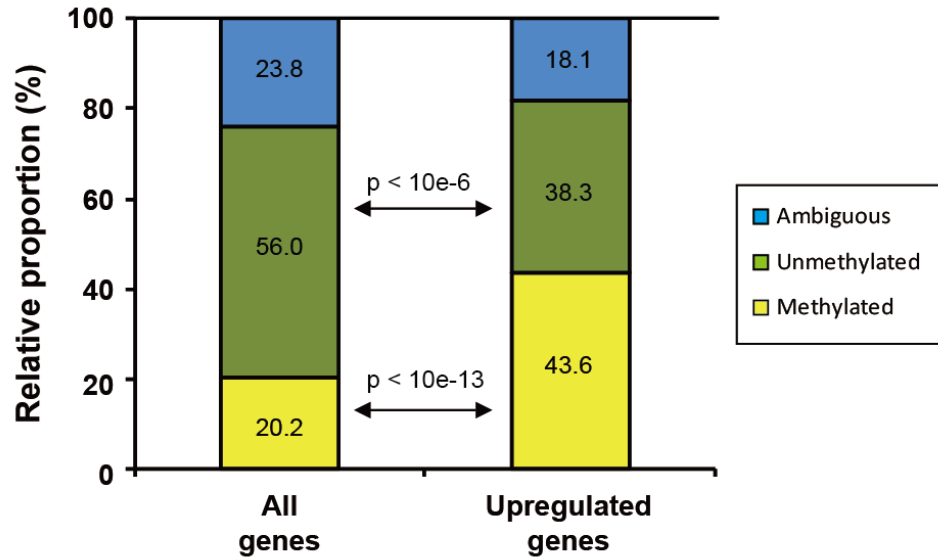

Relative portions of methylated genes and unmethylated genes among the upregulated genes in *vim1/2/3* and the all annotated *Arabidopsis* genes included in the microarray analyses were compared. The p-value of enrichment for methylated genes or unmethylated genes was calculated using the hypergeometric distribution, based on the list of genes with or without DNA methylation (Zilberman *et al.*, 2007). It is noted that pseudogenes and TEs among genes with DNA methylation were not included as background for enrichment test of methylated genes.

Supplemental Figure 2. Genes whose transcripts were decreased in the *vim1/2/3* mutant.

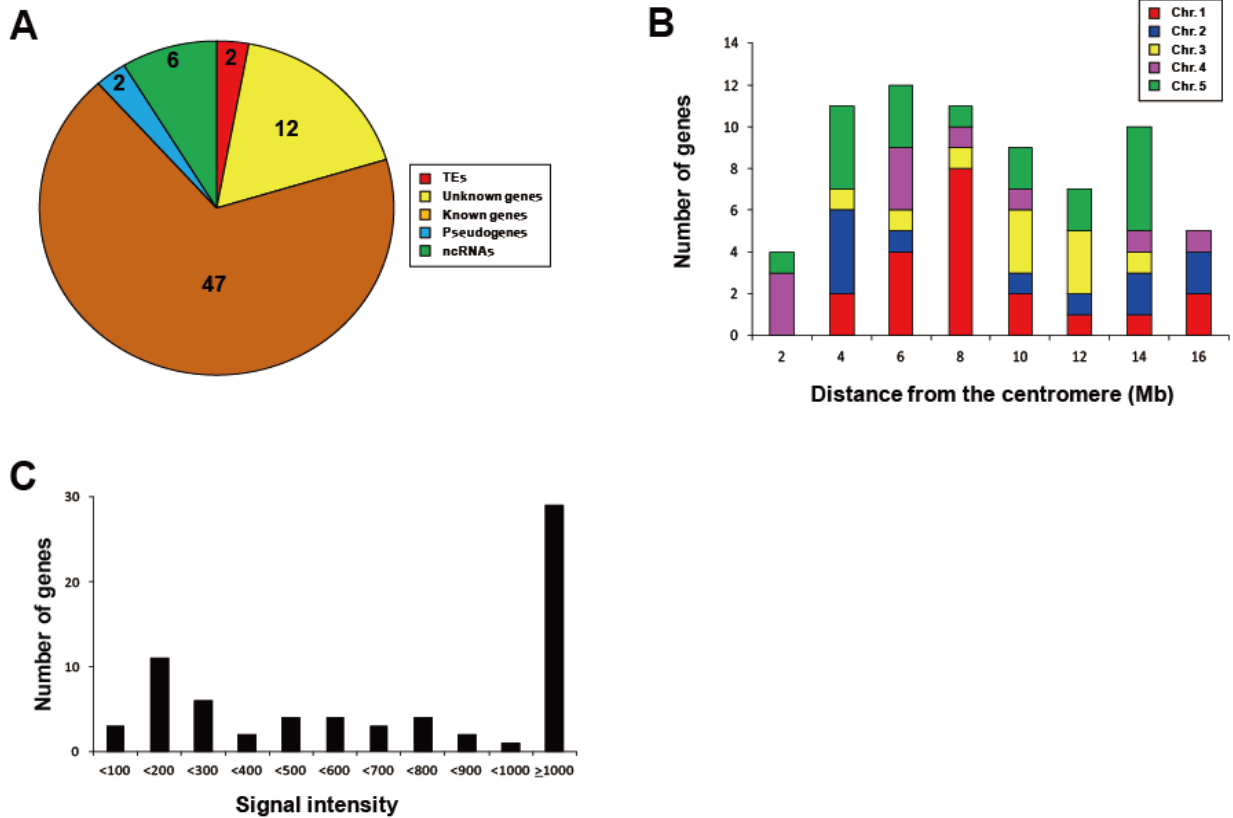

(A) Categorization of genes downregulated in the *vim1/2/3* mutant in comparison with WT. Transposons or related elements (TEs) (red); genes for unknown proteins (yellow); genes for known proteins (orange); pseudogenes (blue); ncRNAs (green). (B) Chromosomal positions of downregulated genes with respect to the centromere. Results for individual chromosomes are shown with the indicated colors. (C) Transcript levels of genes downregulated in *vim1/2/3* in comparison with WT plants. The number of genes within the indicated ranges of signal intensity from the microarray data in WT plants is shown.

**Supplemental Figure 3. Validation of transcriptional derepression of the putative targets of the VIM proteins.**

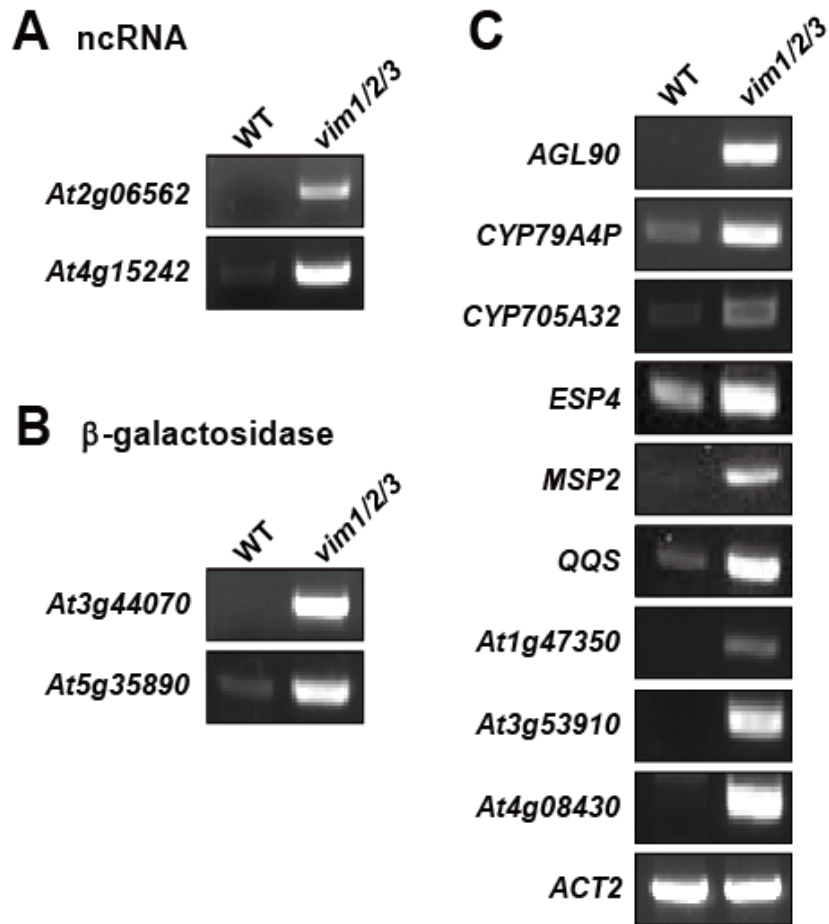

Reverse transcription polymerase chain reaction (RT-PCR) was used to validate microarray gene expression data in wild type (WT) and *vim1/2/3*. RT-PCR analysis of two ncRNAs selected from thirteen upregulated ncRNAs (**A**), two genes selected from ten upregulated putative  $\beta$ -galactosidase genes (**B**), and nine genes chosen from 133 upregulated genes of known function or those similar to known genes (**C**). Total RNA for RT-PCR analysis was isolated from 14-day-old WT and *vim1/2/3* plants. *ACT2* was used as an internal control. Results were consistent in three biological replicates.

**Supplemental Figure 4. Schematic of VIM1 target genes showing regions amplified by the primers used for bisulfite sequencing and ChIP-qPCR analyses.**

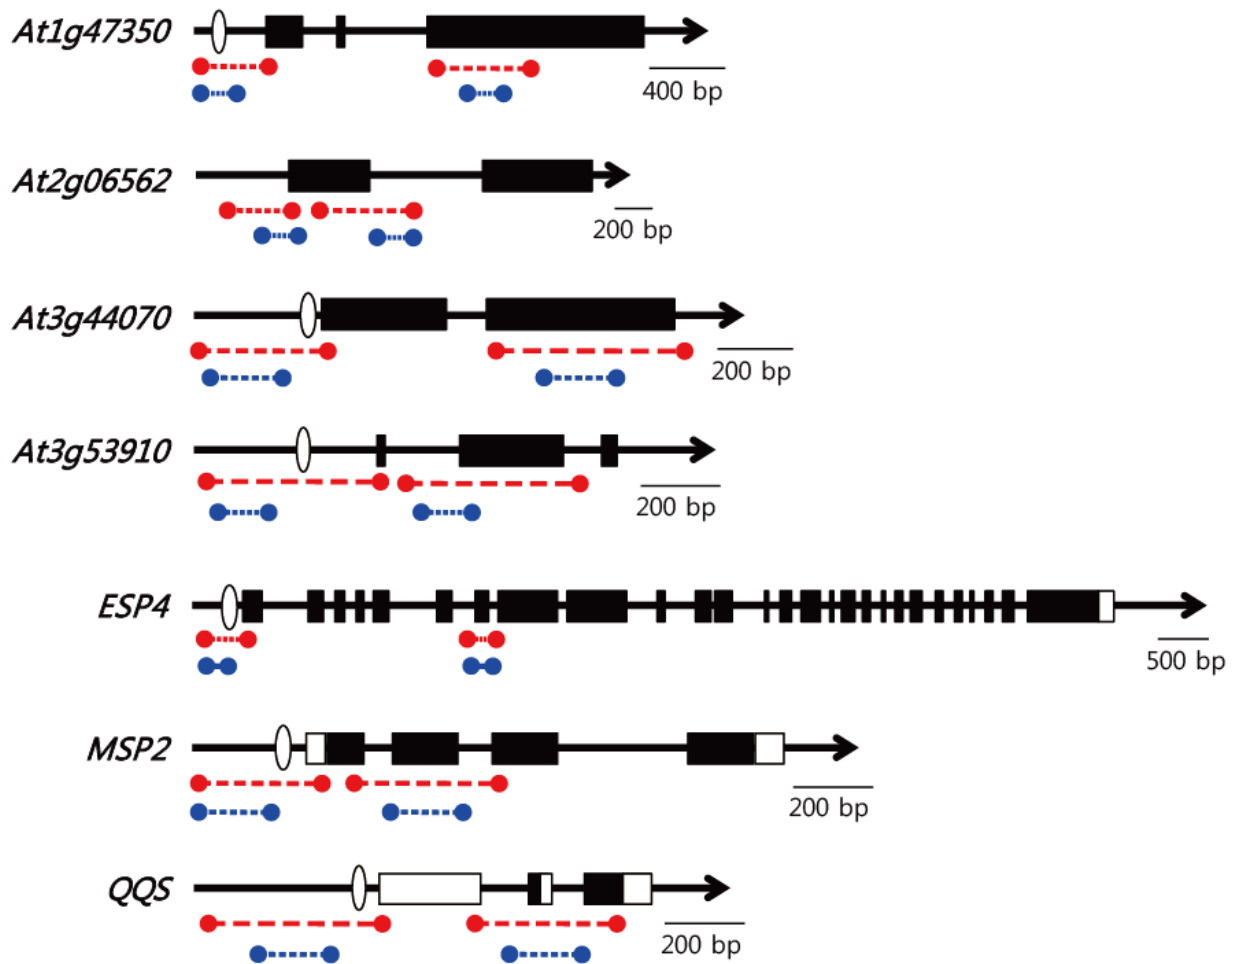

The positions and sizes of the amplified fragments for bisulfite sequencing (red dashed line) and ChIP-qPCR (blue dashed line) analyses from promoter and transcribed areas are indicated. Black boxes indicate exons and black lines indicate introns and intergenic regions. White ovals and boxes represent putative TATA boxes and known 5' or 3' untranslated regions, respectively.

**Supplemental Table 1. AGI annotated genes upregulated in *vim1/2/3*.**

The AGI genes that were transcriptionally upregulated in *vim1/2/3* compared with wild-type (WT) plants (fold-change  $\geq 5.0$ ,  $p < 0.05$ ) are listed.

| At number | <i>vim1/2/3</i><br>intensity | WT<br>intensity | <i>vim1/2/3</i><br>/<br>WT | p-value  | Gene_Name                          |
|-----------|------------------------------|-----------------|----------------------------|----------|------------------------------------|
| AT1G01530 | 164.67                       | 18.12           | 9.60                       | 3.08E-04 | AGL28                              |
| AT1G02580 | 1294.23                      | 156.78          | 17.12                      | 6.10E-03 | MEA                                |
| AT1G02920 | 707.65                       | 153.31          | 5.32                       | 3.42E-03 | ATGSTF7                            |
| AT1G02930 | 11148.01                     | 2603.43         | 5.48                       | 2.06E-02 | ATGSTF6                            |
| AT1G06135 | 2611.13                      | 687.27          | 7.35                       | 1.50E-02 | Unknown                            |
| AT1G08105 | 293.78                       | 58.26           | 5.55                       | 2.60E-05 | TE                                 |
| AT1G10710 | 2613.13                      | 451.13          | 5.19                       | 2.13E-05 | PHS1                               |
| AT1G12064 | 1784.06                      | 268.42          | 6.75                       | 2.47E-05 | Unknown                            |
| AT1G12667 | 421.35                       | 15.55           | 19.79                      | 1.77E-03 | Pseudogene                         |
| AT1G13470 | 4154.28                      | 770.28          | 6.08                       | 3.88E-02 | Unknown                            |
| AT1G16225 | 527.63                       | 71.06           | 7.44                       | 8.09E-05 | Unknown                            |
| AT1G18130 | 13323.74                     | 329.90          | 37.59                      | 3.73E-05 | ClassII aaRS and biotin synthetase |
| AT1G20390 | 2504.48                      | 83.44           | 30.10                      | 3.91E-05 | TE                                 |
| AT1G20400 | 5726.73                      | 201.16          | 28.36                      | 3.91E-05 | Unknown                            |
| AT1G20795 | 160.54                       | 13.76           | 6.39                       | 4.27E-02 | F-box family protein               |
| AT1G22590 | 6961.18                      | 828.14          | 8.08                       | 6.21E-05 | AGL87                              |
| AT1G24060 | 358.14                       | 16.85           | 15.11                      | 1.05E-04 | Unknown                            |
| AT1G24110 | 23190.27                     | 3183.81         | 6.95                       | 7.08E-05 | Putative peroxidase                |
| AT1G24380 | 5455.88                      | 332.26          | 18.61                      | 1.51E-06 | Unknown                            |
| AT1G25430 | 2584.14                      | 339.32          | 8.01                       | 3.21E-06 | TE                                 |
| AT1G26558 | 428.99                       | 89.12           | 5.04                       | 2.59E-03 | ncRNA                              |
| AT1G27990 | 366.09                       | 38.03           | 9.96                       | 2.73E-05 | Unknown                            |
| AT1G28000 | 2423.71                      | 228.15          | 11.42                      | 1.72E-04 | PPR superfamily protein            |
| AT1G28695 | 2019.89                      | 181.67          | 10.80                      | 5.41E-05 | Unknown                            |
| AT1G30810 | 42217.85                     | 7286.37         | 5.95                       | 8.39E-05 | Transcription factor               |
| AT1G31166 | 435.94                       | 39.47           | 5.77                       | 1.27E-02 | TE                                 |
| AT1G31900 | 2093.18                      | 408.24          | 5.89                       | 2.24E-05 | Pseudogene                         |
| AT1G32000 | 4550.93                      | 308.16          | 15.55                      | 1.89E-06 | Unknown                            |
| AT1G32010 | 1700.53                      | 79.95           | 19.17                      | 1.06E-05 | Myosin heavy chain-related         |
| AT1G33460 | 3030.22                      | 93.20           | 32.64                      | 3.84E-05 | TE                                 |
| AT1G33840 | 941.80                       | 53.37           | 12.53                      | 8.38E-03 | Unknown                            |
| AT1G34042 | 9985.44                      | 1838.56         | 5.14                       | 9.19E-05 | Unknown                            |
| AT1G34440 | 397.27                       | 24.26           | 17.55                      | 1.21E-04 | Unknown                            |
| AT1G34545 | 245.83                       | 20.79           | 13.79                      | 1.20E-05 | TE                                 |
| AT1G34680 | 296.60                       | 33.07           | 7.22                       | 5.28E-04 | Pseudogene                         |
| AT1G34810 | 364.31                       | 17.20           | 18.51                      | 6.07E-04 | Plant thionin family protein       |
| AT1G34860 | 113.13                       | 17.70           | 6.21                       | 6.83E-04 | Plant thionin family protein       |
| AT1G35500 | 1141.06                      | 70.64           | 15.58                      | 1.78E-06 | Unknown                            |

|           |          |         |       |          |                              |
|-----------|----------|---------|-------|----------|------------------------------|
| AT1G35614 | 504.79   | 27.33   | 19.05 | 3.22E-05 | Unknown                      |
| AT1G35617 | 958.05   | 40.49   | 26.04 | 1.50E-06 | Unknown                      |
| AT1G35647 | 1225.52  | 39.19   | 37.14 | 1.47E-06 | TE                           |
| AT1G36020 | 1252.80  | 87.58   | 9.59  | 3.34E-03 | Unknown                      |
| AT1G36100 | 315.26   | 22.44   | 19.00 | 1.74E-03 | Myosin heavy chain-related   |
| AT1G36190 | 36707.22 | 1167.50 | 32.01 | 3.85E-05 | TE                           |
| AT1G36210 | 102.00   | 10.00   | 9.44  | 1.01E-03 | TE                           |
| AT1G36272 | 2707.48  | 239.36  | 11.64 | 5.28E-05 | Unknown                      |
| AT1G36360 | 10140.64 | 267.91  | 37.17 | 3.72E-05 | TE                           |
| AT1G36580 | 6317.15  | 271.05  | 23.31 | 4.08E-05 | Unknown                      |
| AT1G36630 | 12509.42 | 400.47  | 29.90 | 3.86E-05 | TE                           |
| AT1G36640 | 5590.33  | 819.07  | 8.43  | 4.14E-03 | Unknown                      |
| AT1G36680 | 293.86   | 11.90   | 16.13 | 2.83E-03 | TE                           |
| AT1G36910 | 274.49   | 13.41   | 18.49 | 1.48E-04 | TE                           |
| AT1G37000 | 69.17    | 12.86   | 5.05  | 6.27E-03 | Beta-galactosidase           |
| AT1G37030 | 151.87   | 11.29   | 7.76  | 3.26E-02 | TE                           |
| AT1G37057 | 6667.10  | 231.71  | 29.57 | 3.88E-05 | TE                           |
| AT1G37063 | 244.48   | 15.78   | 17.35 | 1.32E-04 | TE                           |
| AT1G37080 | 371.52   | 15.14   | 22.21 | 2.23E-05 | TE                           |
| AT1G37100 | 157.89   | 13.55   | 11.09 | 3.57E-04 | TE                           |
| AT1G37180 | 78.52    | 10.00   | 7.29  | 2.21E-03 | TE                           |
| AT1G37735 | 292.21   | 38.25   | 8.58  | 3.35E-05 | TE                           |
| AT1G38280 | 4180.16  | 226.79  | 18.93 | 1.80E-06 | TE                           |
| AT1G38410 | 185.30   | 23.42   | 11.00 | 1.05E-02 | TE                           |
| AT1G38460 | 380.44   | 45.28   | 11.48 | 1.81E-04 | TE                           |
| AT1G41750 | 637.77   | 33.90   | 12.72 | 1.25E-03 | TE                           |
| AT1G42110 | 1674.37  | 86.82   | 19.17 | 4.51E-05 | TE                           |
| AT1G42200 | 2407.35  | 75.58   | 28.38 | 4.04E-05 | TE                           |
| AT1G42210 | 1541.85  | 77.18   | 20.23 | 4.37E-05 | TE                           |
| AT1G42410 | 32642.32 | 2532.83 | 15.61 | 8.47E-05 | TE                           |
| AT1G42420 | 104.70   | 10.60   | 6.52  | 1.94E-02 | TE                           |
| AT1G42595 | 1495.15  | 182.30  | 8.18  | 6.36E-05 | TE                           |
| AT1G42680 | 1456.26  | 217.43  | 6.71  | 7.47E-05 | Myosin-related               |
| AT1G43920 | 770.49   | 116.06  | 6.76  | 8.50E-05 | TE                           |
| AT1G44040 | 2704.18  | 147.04  | 18.79 | 4.38E-05 | Pseudogene                   |
| AT1G44890 | 1292.39  | 86.98   | 12.48 | 1.06E-04 | Unknown                      |
| AT1G47265 | 570.37   | 47.25   | 12.42 | 1.29E-04 | Unknown                      |
| AT1G47350 | 589.48   | 39.32   | 15.54 | 2.91E-06 | F-box family protein-related |
| AT1G47660 | 162.36   | 10.00   | 13.29 | 7.05E-04 | Unknown                      |
| AT1G48625 | 43010.92 | 7346.82 | 5.89  | 8.47E-05 | Pseudogene                   |
| AT1G49680 | 13749.41 | 896.48  | 15.00 | 4.62E-05 | Unknown                      |
| AT1G49715 | 70.77    | 10.13   | 5.69  | 3.57E-03 | DEFL family protein          |
| AT1G50350 | 98.02    | 11.92   | 6.25  | 4.48E-03 | Unknown                      |
| AT1G50660 | 38819.23 | 3008.14 | 12.95 | 5.04E-05 | Unknown                      |
| AT1G50735 | 781.19   | 85.69   | 7.67  | 4.47E-05 | TE                           |
| AT1G51172 | 85.28    | 10.47   | 5.86  | 1.38E-02 | Unknown                      |
| AT1G51920 | 3648.01  | 778.16  | 6.03  | 6.16E-04 | Unknown                      |
| AT1G52460 | 2041.22  | 210.43  | 9.01  | 2.72E-06 | Hydrolase                    |

|           |          |         |       |          |                                      |
|-----------|----------|---------|-------|----------|--------------------------------------|
| AT1G53480 | 27140.57 | 917.20  | 30.32 | 3.86E-05 | MRD1                                 |
| AT1G53490 | 37524.04 | 1656.01 | 23.24 | 4.16E-05 | DNA binding                          |
| AT1G57670 | 402.52   | 20.84   | 19.84 | 7.72E-05 | TIR domain-containing protein        |
| AT1G59770 | 143.74   | 22.52   | 6.53  | 1.27E-03 | TE                                   |
| AT1G59920 | 24102.31 | 663.48  | 36.17 | 3.73E-05 | Unknown                              |
| AT1G59930 | 30550.85 | 797.96  | 38.44 | 3.71E-05 | Unknown                              |
| AT1G60570 | 39339.06 | 4487.29 | 8.80  | 6.19E-05 | Kelch repeat/F-box family protein    |
| AT1G64790 | 12815.44 | 589.99  | 22.75 | 4.09E-05 | ILA                                  |
| AT1G65483 | 271.45   | 57.82   | 5.63  | 6.29E-03 | Unknown                              |
| AT1G67105 | 44043.90 | 3413.92 | 14.50 | 1.80E-06 | ncRNA                                |
| AT1G67635 | 685.99   | 131.40  | 8.25  | 2.49E-02 | Unknown                              |
| AT1G72060 | 6020.17  | 974.60  | 6.53  | 4.83E-03 | Serine-type endopeptidase inhibitor  |
| AT1G73603 | 888.16   | 42.92   | 23.66 | 1.68E-06 | LCR64                                |
| AT1G73607 | 244.81   | 14.28   | 17.19 | 1.45E-04 | LCR65                                |
| AT1G78095 | 502.33   | 71.43   | 6.87  | 3.55E-05 | TE                                   |
| AT1G79100 | 93.89    | 11.75   | 6.40  | 3.79E-03 | Arginine/serine-rich protein-related |
| AT2G01310 | 11020.64 | 1725.23 | 6.25  | 2.60E-05 | Unknown                              |
| AT2G02030 | 175.35   | 14.96   | 10.14 | 3.35E-04 | F-box family protein                 |
| AT2G03720 | 8177.98  | 490.46  | 17.34 | 1.26E-05 | MRH6                                 |
| AT2G03970 | 1360.23  | 97.57   | 13.68 | 1.85E-06 | TE                                   |
| AT2G04020 | 494.74   | 86.63   | 6.58  | 2.35E-03 | GDSL-motif lipase family protein     |
| AT2G04031 | 2666.93  | 232.83  | 11.47 | 5.24E-05 | ECA1-related family protein          |
| AT2G04037 | 945.01   | 48.08   | 18.68 | 4.81E-06 | Unknown                              |
| AT2G04600 | 3221.33  | 325.86  | 12.90 | 4.07E-04 | TE                                   |
| AT2G05660 | 5343.94  | 200.80  | 24.30 | 4.13E-05 | TE                                   |
| AT2G05752 | 178.19   | 18.26   | 11.53 | 4.29E-05 | Unknown                              |
| AT2G05915 | 19330.70 | 516.56  | 38.69 | 3.68E-05 | Unknown                              |
| AT2G05995 | 16795.60 | 2271.97 | 8.46  | 5.32E-03 | ncRNA                                |
| AT2G06002 | 36269.68 | 3061.08 | 12.08 | 3.54E-05 | ncRNA                                |
| AT2G06420 | 5504.01  | 295.19  | 17.16 | 4.48E-05 | Unknown                              |
| AT2G06480 | 1272.36  | 81.51   | 16.21 | 4.77E-05 | TE                                   |
| AT2G06490 | 7979.87  | 249.83  | 31.67 | 3.81E-05 | TE                                   |
| AT2G06562 | 33002.31 | 794.81  | 41.27 | 3.66E-05 | ncRNA                                |
| AT2G06908 | 1635.23  | 68.56   | 33.22 | 1.81E-03 | Unknown                              |
| AT2G07213 | 2986.38  | 83.23   | 35.12 | 3.80E-05 | ncRNA                                |
| AT2G07215 | 3131.95  | 113.58  | 30.12 | 3.96E-05 | Unknown                              |
| AT2G07635 | 42441.73 | 4748.89 | 9.00  | 6.14E-05 | TE                                   |
| AT2G07710 | 404.53   | 65.74   | 6.38  | 1.47E-04 | TE                                   |
| AT2G07730 | 117.35   | 10.75   | 7.50  | 1.46E-02 | TE                                   |
| AT2G09838 | 756.04   | 30.85   | 18.43 | 5.50E-04 | Unknown                              |
| AT2G10080 | 88.35    | 11.38   | 5.65  | 3.02E-02 | TE                                   |
| AT2G10100 | 92.61    | 10.40   | 8.52  | 1.11E-03 | TE                                   |
| AT2G10510 | 2956.40  | 167.50  | 17.75 | 4.40E-05 | TE                                   |
| AT2G10540 | 1460.22  | 100.18  | 16.70 | 7.22E-06 | TE                                   |
| AT2G10550 | 230.28   | 32.59   | 10.08 | 5.81E-04 | Uracil DNA glycosylase family        |
| AT2G10650 | 6024.19  | 611.90  | 9.52  | 5.62E-05 | TE                                   |
| AT2G10890 | 589.15   | 47.38   | 12.28 | 6.09E-05 | TE                                   |
| AT2G10900 | 339.69   | 12.75   | 15.03 | 4.11E-02 | TE                                   |

|           |          |          |       |          |                               |
|-----------|----------|----------|-------|----------|-------------------------------|
| AT2G10960 | 1992.01  | 84.11    | 23.84 | 4.16E-05 | TE                            |
| AT2G10965 | 1202.75  | 49.08    | 24.83 | 4.28E-05 | Unknown                       |
| AT2G10980 | 2871.63  | 89.59    | 30.95 | 3.91E-05 | TE                            |
| AT2G11015 | 125.37   | 18.92    | 5.57  | 1.14E-02 | Unknown                       |
| AT2G11100 | 122.31   | 15.58    | 6.85  | 8.46E-03 | TE                            |
| AT2G11320 | 290.61   | 17.98    | 16.38 | 3.16E-04 | TE                            |
| AT2G11550 | 7610.45  | 775.75   | 8.93  | 2.33E-03 | TE                            |
| AT2G11590 | 289.80   | 18.53    | 15.70 | 1.09E-04 | TE                            |
| AT2G11620 | 1659.03  | 71.50    | 20.93 | 5.59E-05 | Unknown                       |
| AT2G11630 | 303.02   | 21.13    | 14.38 | 3.74E-05 | Pseudogene                    |
| AT2G11650 | 236.86   | 13.31    | 16.51 | 1.79E-05 | TE                            |
| AT2G11651 | 698.46   | 96.86    | 9.70  | 1.56E-03 | Unknown                       |
| AT2G11700 | 202.36   | 28.26    | 6.13  | 1.39E-02 | TE                            |
| AT2G11775 | 6906.58  | 202.87   | 34.40 | 3.77E-05 | TE                            |
| AT2G11778 | 7025.43  | 486.26   | 14.72 | 4.63E-05 | Unknown                       |
| AT2G11780 | 7570.69  | 294.95   | 26.86 | 1.34E-06 | TE                            |
| AT2G11790 | 322.78   | 19.71    | 17.58 | 3.57E-04 | TE                            |
| AT2G12050 | 643.49   | 37.09    | 18.67 | 6.92E-05 | Pseudogene                    |
| AT2G12340 | 439.75   | 18.83    | 18.36 | 8.97E-03 | TE                            |
| AT2G12420 | 5394.64  | 171.96   | 31.18 | 3.85E-05 | TE                            |
| AT2G12500 | 400.59   | 13.45    | 30.35 | 7.48E-05 | TE                            |
| AT2G12570 | 159.76   | 20.92    | 7.85  | 1.61E-03 | TE                            |
| AT2G12935 | 4975.87  | 294.24   | 17.81 | 4.40E-05 | Unknown                       |
| AT2G13118 | 356.62   | 28.43    | 13.17 | 1.65E-05 | TE                            |
| AT2G13410 | 2051.58  | 75.01    | 26.16 | 4.44E-05 | Pseudogene                    |
| AT2G13463 | 5304.19  | 357.33   | 14.60 | 4.67E-05 | Unknown                       |
| AT2G13547 | 4734.63  | 200.37   | 24.75 | 4.05E-05 | Unknown                       |
| AT2G13760 | 2118.25  | 142.28   | 16.54 | 2.37E-06 | Unknown                       |
| AT2G13770 | 306.40   | 50.51    | 6.69  | 1.08E-05 | Unknown                       |
| AT2G13865 | 32361.27 | 10871.53 | 5.35  | 1.48E-02 | TE                            |
| AT2G13980 | 1446.69  | 61.86    | 21.53 | 4.47E-05 | Nucleic acid binding          |
| AT2G14405 | 576.46   | 37.32    | 12.22 | 3.12E-04 | Pseudogene                    |
| AT2G14410 | 833.62   | 24.45    | 28.50 | 7.66E-05 | Pseudogene                    |
| AT2G14430 | 124.55   | 17.16    | 5.35  | 3.70E-02 | TE                            |
| AT2G14560 | 12729.27 | 2367.81  | 5.63  | 2.74E-02 | LURP1                         |
| AT2G14610 | 8838.10  | 1071.75  | 8.05  | 4.02E-03 | PR1                           |
| AT2G14970 | 3550.32  | 93.45    | 36.00 | 3.80E-05 | TE                            |
| AT2G15410 | 2736.72  | 83.18    | 32.84 | 3.85E-05 | TE                            |
| AT2G15555 | 45088.84 | 3152.07  | 18.08 | 1.49E-03 | ncRNA                         |
| AT2G15750 | 441.21   | 35.92    | 14.15 | 1.87E-05 | TE                            |
| AT2G15800 | 131.81   | 14.25    | 7.72  | 6.13E-04 | TE                            |
| AT2G15940 | 1704.55  | 87.18    | 19.99 | 4.36E-05 | TE                            |
| AT2G16020 | 7321.82  | 233.48   | 31.55 | 3.82E-05 | Unknown                       |
| AT2G16050 | 23438.71 | 2189.97  | 11.88 | 2.80E-05 | Cys/His-rich C1 domain family |
| AT2G16310 | 419.85   | 74.08    | 5.69  | 1.27E-04 | Pseudogene                    |
| AT2G17690 | 18671.70 | 371.63   | 33.87 | 7.44E-04 | SDC                           |
| AT2G17910 | 385.11   | 57.46    | 5.85  | 1.08E-03 | TE                            |
| AT2G18540 | 42701.81 | 4220.12  | 10.53 | 5.64E-05 | Cupin family protein          |



|           |          |         |       |          |                                     |
|-----------|----------|---------|-------|----------|-------------------------------------|
| AT2G18570 | 5935.37  | 1112.63 | 5.62  | 7.10E-06 | UDP-glucosyl transferase family     |
| AT2G18610 | 928.91   | 66.80   | 13.38 | 7.32E-05 | Unknown                             |
| AT2G18660 | 11166.49 | 2131.70 | 6.24  | 3.61E-02 | EXLB3                               |
| AT2G19010 | 312.95   | 28.37   | 10.14 | 6.75E-04 | GDSL-motif lipase family protein    |
| AT2G19850 | 3764.84  | 116.84  | 33.64 | 3.81E-05 | Unknown                             |
| AT2G24735 | 189.88   | 41.83   | 5.44  | 9.64E-03 | Unknown                             |
| AT2G24780 | 647.40   | 58.56   | 14.59 | 6.59E-05 | Unknown                             |
| AT2G25735 | 7145.64  | 1627.66 | 5.21  | 2.29E-02 | Unknown                             |
| AT2G26630 | 1413.31  | 112.82  | 12.60 | 5.13E-05 | TE                                  |
| AT2G27540 | 465.50   | 19.59   | 9.06  | 4.68E-02 | Unknown                             |
| AT2G28980 | 576.22   | 70.55   | 8.21  | 8.28E-05 | TE                                  |
| AT2G31080 | 4892.72  | 99.48   | 47.97 | 3.60E-05 | TE                                  |
| AT2G32510 | 39737.47 | 4246.57 | 9.54  | 1.40E-05 | MAPKKK17                            |
| AT2G34120 | 624.15   | 30.78   | 19.57 | 5.11E-05 | Unknown                             |
| AT2G36710 | 452.21   | 109.41  | 7.52  | 1.75E-02 | Pectinesterase family protein       |
| AT2G41400 | 1655.75  | 69.78   | 24.04 | 4.38E-05 | Unknown                             |
| AT2G41650 | 6679.33  | 1423.88 | 5.31  | 5.24E-05 | Unknown                             |
| AT2G44240 | 14019.33 | 1269.24 | 10.75 | 5.97E-04 | Unknown                             |
| AT2G45580 | 261.54   | 71.90   | 5.10  | 3.24E-03 | CYP76C3                             |
| AT3G01345 | 884.05   | 66.57   | 13.19 | 5.31E-05 | Unknown                             |
| AT3G01830 | 5654.39  | 664.29  | 5.10  | 6.97E-03 | Putative calmodulin-related protein |
| AT3G02100 | 3841.26  | 391.18  | 9.49  | 6.78E-04 | UDP-glucosyl transferase family     |
| AT3G03400 | 871.66   | 87.88   | 8.08  | 9.80E-06 | Putative calmodulin-related protein |
| AT3G09800 | 1430.43  | 107.87  | 12.54 | 1.69E-05 | SNARE-like superfamily protein      |
| AT3G10510 | 40101.98 | 5089.81 | 8.07  | 6.60E-05 | Kelch repeat/F-box family protein   |
| AT3G10595 | 306.34   | 46.40   | 7.77  | 9.69E-03 | Myb family transcription factor     |
| AT3G11080 | 573.28   | 130.89  | 5.85  | 1.02E-03 | AtRLP35                             |
| AT3G11990 | 2120.97  | 165.71  | 12.72 | 2.26E-06 | Unknown                             |
| AT3G14670 | 9558.76  | 396.91  | 23.31 | 4.04E-05 | Unknown                             |
| AT3G14981 | 360.68   | 35.48   | 11.45 | 7.75E-05 | Unknown                             |
| AT3G15320 | 701.07   | 61.39   | 9.51  | 8.20E-03 | TE                                  |
| AT3G15330 | 2176.04  | 287.44  | 6.94  | 1.35E-03 | Pseudogene                          |
| AT3G16100 | 27231.60 | 4268.40 | 6.31  | 3.92E-05 | ATRABG3C                            |
| AT3G18720 | 358.87   | 49.30   | 8.06  | 8.27E-04 | F-box family protein                |
| AT3G19020 | 7172.29  | 1281.97 | 5.95  | 5.05E-04 | Leucine-rich repeat family protein  |
| AT3G20950 | 1761.15  | 72.42   | 25.31 | 4.18E-05 | CYP705A32                           |
| AT3G21450 | 646.56   | 63.52   | 8.58  | 1.19E-05 | Protein kinase family protein       |
| AT3G21570 | 419.07   | 24.72   | 17.12 | 1.55E-04 | Unknown                             |
| AT3G22022 | 185.89   | 10.00   | 15.64 | 1.29E-04 | Unknown                             |
| AT3G22937 | 296.43   | 20.62   | 16.25 | 2.96E-04 | Pseudogene                          |
| AT3G23060 | 183.42   | 21.55   | 5.80  | 3.21E-02 | Zinc finger family protein          |
| AT3G23085 | 88.67    | 11.46   | 6.00  | 4.05E-03 | TE                                  |
| AT3G24516 | 2057.28  | 176.12  | 12.11 | 5.15E-05 | Unknown                             |
| AT3G24517 | 3056.02  | 66.72   | 46.22 | 3.62E-05 | Unknown                             |
| AT3G24518 | 6443.18  | 151.39  | 42.65 | 3.63E-05 | ncRNA                               |
| AT3G24542 | 1610.37  | 73.15   | 22.41 | 4.32E-05 | Beta-galactosidase                  |
| AT3G25719 | 38674.21 | 4743.71 | 8.14  | 6.51E-05 | Unknown                             |
| AT3G25720 | 134.67   | 28.32   | 5.25  | 2.31E-03 | Unknown                             |

|           |          |         |       |          |             |
|-----------|----------|---------|-------|----------|-------------|
| AT3G27250 | 3043.34  | 311.06  | 9.51  | 7.69E-04 | Unknown     |
| AT3G28153 | 6790.56  | 210.89  | 29.85 | 1.38E-18 | TE          |
| AT3G28291 | 2402.39  | 322.85  | 7.14  | 7.16E-05 | Unknown     |
| AT3G28830 | 510.57   | 38.47   | 11.94 | 9.32E-04 | Unknown     |
| AT3G28899 | 39595.43 | 1781.64 | 22.98 | 4.19E-05 | Unknown     |
| AT3G28918 | 1090.37  | 109.70  | 9.13  | 3.09E-05 | Unknown     |
| AT3G29610 | 2996.44  | 254.54  | 11.65 | 5.14E-05 | TE          |
| AT3G29612 | 7363.29  | 285.67  | 25.11 | 4.00E-05 | TE          |
| AT3G29618 | 1232.43  | 107.94  | 9.27  | 3.64E-04 | TE          |
| AT3G29634 | 379.90   | 39.94   | 10.10 | 2.00E-03 | TE          |
| AT3G29636 | 266.59   | 16.20   | 14.34 | 3.38E-03 | TE          |
| AT3G29639 | 38629.43 | 3183.60 | 12.64 | 5.15E-05 | Unknown     |
| AT3G29641 | 159.36   | 17.40   | 6.67  | 9.21E-03 | TE          |
| AT3G29738 | 4834.77  | 606.15  | 8.41  | 6.01E-05 | TE          |
| AT3G29767 | 2681.28  | 93.59   | 28.32 | 1.50E-06 | TE          |
| AT3G29787 | 775.97   | 71.04   | 10.44 | 6.38E-05 | TE          |
| AT3G29790 | 306.84   | 25.01   | 14.89 | 9.53E-06 | Unknown     |
| AT3G30187 | 5013.94  | 335.89  | 14.55 | 4.67E-05 | Pseudogene  |
| AT3G30218 | 474.78   | 17.88   | 30.97 | 3.15E-06 | TE          |
| AT3G30390 | 520.64   | 85.26   | 5.09  | 5.87E-04 | TE          |
| AT3G30433 | 182.38   | 13.87   | 12.02 | 4.21E-04 | TE          |
| AT3G30710 | 500.38   | 15.30   | 31.03 | 5.12E-05 | TE          |
| AT3G30720 | 7985.36  | 854.06  | 9.24  | 4.07E-06 | QQS         |
| AT3G30746 | 1327.73  | 31.85   | 38.43 | 4.49E-05 | TE          |
| AT3G30751 | 208.59   | 22.77   | 7.64  | 8.23E-04 | TE          |
| AT3G30820 | 95.34    | 11.96   | 6.92  | 1.49E-03 | Unknown     |
| AT3G31310 | 335.41   | 26.83   | 13.24 | 8.72E-05 | TE          |
| AT3G31314 | 5200.93  | 328.15  | 15.93 | 4.50E-05 | TE          |
| AT3G31356 | 688.14   | 43.87   | 18.83 | 4.74E-04 | TE          |
| AT3G31390 | 102.68   | 15.21   | 5.50  | 7.78E-03 | TE          |
| AT3G31406 | 7423.30  | 656.17  | 11.38 | 5.12E-05 | TE          |
| AT3G31422 | 131.08   | 13.26   | 8.07  | 7.71E-03 | TE          |
| AT3G31442 | 2737.89  | 200.18  | 13.94 | 4.77E-05 | SADHU7-2 TE |
| AT3G31908 | 127.08   | 12.01   | 8.09  | 7.65E-04 | Pseudogene  |
| AT3G31909 | 511.38   | 26.48   | 11.59 | 1.88E-03 | TE          |
| AT3G31910 | 676.18   | 32.76   | 19.39 | 5.22E-05 | Unknown     |
| AT3G31915 | 861.48   | 48.99   | 18.59 | 4.84E-05 | TE          |
| AT3G31950 | 2253.01  | 71.79   | 31.25 | 4.61E-05 | Unknown     |
| AT3G32160 | 185.55   | 19.20   | 6.32  | 1.27E-02 | Unknown     |
| AT3G32200 | 330.31   | 12.19   | 16.14 | 8.02E-03 | Unknown     |
| AT3G32230 | 4830.35  | 145.05  | 34.02 | 3.81E-05 | TE          |
| AT3G32240 | 39852.31 | 2287.16 | 18.12 | 4.49E-05 | TE          |
| AT3G32377 | 2455.58  | 113.95  | 21.59 | 4.33E-05 | Pseudogene  |
| AT3G32902 | 1530.79  | 50.06   | 32.98 | 2.30E-06 | TE          |
| AT3G32914 | 109.15   | 10.93   | 6.95  | 3.06E-02 | TE          |
| AT3G32966 | 1857.98  | 60.31   | 32.38 | 3.96E-05 | TE          |
| AT3G33045 | 1988.99  | 63.73   | 31.37 | 3.96E-05 | TE          |
| AT3G33197 | 40038.31 | 2189.55 | 21.89 | 4.73E-05 | TE          |

|           |          |         |       |          |                                |
|-----------|----------|---------|-------|----------|--------------------------------|
| AT3G33528 | 2481.02  | 171.93  | 14.31 | 4.74E-05 | Unknown                        |
| AT3G42083 | 222.82   | 25.03   | 13.22 | 1.14E-03 | TE                             |
| AT3G42206 | 705.07   | 54.11   | 11.75 | 8.57E-19 | TE                             |
| AT3G42310 | 1175.31  | 83.07   | 10.29 | 6.06E-05 | Unknown                        |
| AT3G42350 | 28379.21 | 822.04  | 31.03 | 3.87E-05 | TE                             |
| AT3G42624 | 168.77   | 12.55   | 13.68 | 1.78E-04 | TE                             |
| AT3G42650 | 49167.51 | 2161.98 | 22.57 | 4.23E-05 | TE                             |
| AT3G42658 | 39486.81 | 1921.51 | 20.94 | 4.28E-05 | SADHU3-2 TE                    |
| AT3G42712 | 9522.66  | 283.42  | 34.44 | 3.75E-05 | TE                             |
| AT3G43020 | 291.82   | 14.49   | 15.76 | 3.19E-05 | TE                             |
| AT3G43148 | 709.98   | 50.78   | 16.32 | 9.87E-05 | Unknown                        |
| AT3G43150 | 858.65   | 47.14   | 13.58 | 3.73E-04 | Unknown                        |
| AT3G43290 | 948.85   | 84.63   | 6.02  | 3.50E-02 | Unknown                        |
| AT3G43420 | 85.06    | 11.60   | 5.59  | 2.77E-02 | Unknown                        |
| AT3G43436 | 658.09   | 23.78   | 29.26 | 4.51E-05 | TE                             |
| AT3G43571 | 4682.04  | 180.74  | 26.27 | 3.99E-05 | TE                             |
| AT3G43572 | 8973.01  | 206.16  | 43.27 | 3.62E-05 | Unknown                        |
| AT3G43574 | 23416.68 | 1160.96 | 21.30 | 4.18E-05 | Unknown                        |
| AT3G43580 | 2050.22  | 197.93  | 11.07 | 3.66E-05 | Beta-galactosidase             |
| AT3G43826 | 410.36   | 98.83   | 5.54  | 7.19E-03 | Pseudogene                     |
| AT3G43833 | 41427.92 | 1448.22 | 29.07 | 3.96E-05 | Unknown                        |
| AT3G43880 | 400.18   | 24.52   | 16.53 | 6.49E-05 | Unknown                        |
| AT3G44006 | 5981.57  | 447.59  | 13.71 | 4.74E-05 | Unknown                        |
| AT3G44042 | 37602.31 | 1464.23 | 25.69 | 4.05E-05 | SADHU3-1 TE                    |
| AT3G44070 | 1231.81  | 42.68   | 28.98 | 4.03E-05 | Beta-galactosidase             |
| AT3G44093 | 13933.81 | 433.33  | 32.43 | 3.77E-05 | TE                             |
| AT3G44261 | 11624.94 | 355.24  | 32.93 | 3.78E-05 | Unknown                        |
| AT3G44325 | 713.33   | 99.93   | 5.73  | 3.64E-03 | TE                             |
| AT3G44790 | 1879.04  | 153.27  | 12.22 | 5.27E-05 | MATH domain-containing protein |
| AT3G45093 | 28059.80 | 1446.20 | 20.52 | 4.27E-05 | TE                             |
| AT3G45510 | 82.31    | 10.55   | 6.37  | 2.96E-03 | Zinc finger family protein     |
| AT3G45525 | 320.35   | 38.43   | 14.43 | 1.74E-02 | Unknown                        |
| AT3G45800 | 1043.38  | 55.08   | 21.25 | 5.42E-05 | Unknown                        |
| AT3G45820 | 27949.40 | 1027.30 | 27.74 | 3.95E-05 | Unknown                        |
| AT3G46390 | 183.88   | 27.25   | 5.92  | 4.72E-04 | Unknown                        |
| AT3G48130 | 8740.34  | 900.86  | 9.44  | 2.68E-04 | RSU1                           |
| AT3G48526 | 268.77   | 56.02   | 5.19  | 2.29E-02 | TE                             |
| AT3G48650 | 9654.28  | 2079.07 | 5.70  | 3.95E-02 | Pseudogene                     |
| AT3G49230 | 670.69   | 81.26   | 6.60  | 1.18E-02 | Unknown                        |
| AT3G49850 | 10494.98 | 1756.24 | 5.78  | 3.82E-03 | TRB3                           |
| AT3G50320 | 6679.23  | 190.76  | 34.91 | 3.82E-05 | Unknown                        |
| AT3G52620 | 5097.89  | 755.60  | 6.59  | 7.13E-05 | Unknown                        |
| AT3G52830 | 38582.83 | 5180.16 | 7.92  | 6.72E-05 | Unknown                        |
| AT3G53910 | 2045.23  | 56.15   | 37.21 | 3.80E-05 | Malate dehydrogenase-related   |
| AT3G54730 | 33393.54 | 964.48  | 34.16 | 3.78E-05 | Unknown                        |
| AT3G56630 | 7591.34  | 1025.40 | 7.13  | 6.75E-05 | CYP94D2                        |
| AT3G60170 | 526.35   | 108.32  | 9.78  | 2.94E-02 | TE                             |
| AT3G60260 | 36319.97 | 5736.53 | 6.57  | 7.72E-05 | ELMO1-related protein          |

|           |          |         |       |          |                               |
|-----------|----------|---------|-------|----------|-------------------------------|
| AT3G60870 | 2744.96  | 334.94  | 7.48  | 6.93E-05 | DNA-binding protein-related   |
| AT4G00700 | 3466.13  | 687.29  | 5.06  | 4.69E-02 | C2 domain-containing protein  |
| AT4G01140 | 17891.45 | 1628.05 | 10.59 | 5.33E-05 | Unknown                       |
| AT4G01980 | 451.71   | 96.56   | 8.34  | 2.39E-02 | TE                            |
| AT4G02380 | 29088.44 | 5900.49 | 5.62  | 8.50E-03 | SAG21                         |
| AT4G02490 | 150.60   | 10.57   | 13.62 | 3.25E-04 | TE                            |
| AT4G03156 | 1285.96  | 124.88  | 10.68 | 5.79E-05 | Small GTPase-related          |
| AT4G03723 | 678.61   | 41.16   | 21.77 | 5.20E-04 | Unknown                       |
| AT4G03870 | 2373.24  | 272.56  | 8.81  | 5.93E-05 | TE                            |
| AT4G03880 | 230.95   | 22.60   | 10.04 | 8.54E-05 | TE                            |
| AT4G03913 | 114.28   | 14.24   | 5.59  | 4.15E-02 | Pseudogene                    |
| AT4G03923 | 23500.07 | 716.15  | 33.16 | 3.79E-05 | TE                            |
| AT4G03950 | 266.32   | 16.99   | 14.86 | 2.23E-04 | Putative G6P /P translocator  |
| AT4G04077 | 2774.66  | 118.41  | 18.97 | 5.59E-04 | ncRNA                         |
| AT4G04100 | 1131.92  | 48.17   | 23.32 | 4.32E-05 | TE                            |
| AT4G04145 | 2730.84  | 129.89  | 20.62 | 4.33E-05 | Pseudogene                    |
| AT4G04250 | 1998.54  | 60.72   | 33.59 | 3.89E-05 | Pseudogene                    |
| AT4G04270 | 2631.55  | 115.07  | 21.01 | 4.57E-05 | TE                            |
| AT4G04293 | 37570.27 | 1258.70 | 30.77 | 3.90E-05 | TE                            |
| AT4G04316 | 362.42   | 14.86   | 18.29 | 1.80E-03 | TE                            |
| AT4G04500 | 99.94    | 14.47   | 5.22  | 2.16E-02 | Protein kinase family protein |
| AT4G04635 | 838.66   | 78.26   | 10.63 | 5.94E-05 | TE                            |
| AT4G04980 | 637.14   | 57.90   | 12.66 | 1.08E-04 | Unknown                       |
| AT4G05505 | 20392.78 | 603.22  | 33.73 | 3.77E-05 | TE                            |
| AT4G05633 | 74.91    | 10.04   | 7.06  | 2.30E-03 | TE                            |
| AT4G06474 | 216.56   | 14.83   | 14.71 | 1.98E-04 | TE                            |
| AT4G06477 | 5918.91  | 573.03  | 11.88 | 4.13E-03 | TE                            |
| AT4G06481 | 250.25   | 12.99   | 18.74 | 1.75E-05 | TE                            |
| AT4G06529 | 7100.64  | 248.81  | 23.57 | 4.14E-05 | TE                            |
| AT4G06541 | 228.62   | 27.08   | 11.41 | 1.95E-03 | TE                            |
| AT4G06572 | 4516.43  | 122.41  | 34.41 | 3.79E-05 | TE                            |
| AT4G06582 | 507.29   | 13.39   | 31.01 | 5.08E-06 | Pseudogene                    |
| AT4G06584 | 1496.51  | 79.54   | 18.41 | 8.68E-05 | TE                            |
| AT4G06597 | 285.83   | 25.43   | 9.98  | 5.02E-04 | Pseudogene                    |
| AT4G06613 | 144.52   | 10.00   | 11.55 | 7.56E-04 | TE                            |
| AT4G06617 | 208.31   | 14.14   | 15.48 | 1.30E-04 | TE                            |
| AT4G06619 | 324.70   | 12.93   | 19.85 | 1.61E-04 | TE                            |
| AT4G06627 | 427.22   | 20.14   | 21.43 | 5.71E-05 | TE                            |
| AT4G06686 | 512.86   | 34.06   | 20.39 | 1.06E-03 | TE                            |
| AT4G06735 | 18264.05 | 2656.22 | 7.15  | 6.02E-06 | TE                            |
| AT4G06748 | 180.20   | 20.69   | 9.63  | 3.40E-04 | Pseudogene                    |
| AT4G07320 | 1643.15  | 97.64   | 13.19 | 7.33E-06 | Pseudogene                    |
| AT4G07526 | 1062.75  | 50.52   | 22.37 | 4.48E-05 | Unknown                       |
| AT4G07560 | 273.36   | 21.94   | 13.43 | 1.01E-04 | TE                            |
| AT4G07630 | 1302.43  | 76.01   | 17.36 | 1.25E-05 | TE                            |
| AT4G07696 | 223.68   | 29.17   | 8.09  | 1.72E-04 | TE                            |
| AT4G07868 | 371.20   | 18.89   | 10.20 | 3.65E-02 | Unknown                       |
| AT4G07940 | 31590.61 | 768.99  | 41.47 | 3.66E-05 | Unknown                       |

|           |          |         |       |          |                                         |
|-----------|----------|---------|-------|----------|-----------------------------------------|
| AT4G07965 | 3646.03  | 137.76  | 26.46 | 3.98E-05 | Unknown                                 |
| AT4G08030 | 71.05    | 10.52   | 5.38  | 7.53E-03 | TE                                      |
| AT4G08039 | 319.76   | 51.10   | 7.31  | 9.05E-04 | Defensin-like family protein            |
| AT4G08053 | 79.23    | 12.53   | 6.37  | 1.39E-03 | TE                                      |
| AT4G08078 | 2170.35  | 269.66  | 7.65  | 5.62E-06 | TE                                      |
| AT4G08105 | 12469.46 | 499.39  | 24.56 | 4.01E-05 | TE                                      |
| AT4G08131 | 127.82   | 13.35   | 9.59  | 6.16E-04 | TE                                      |
| AT4G08420 | 203.30   | 19.08   | 9.59  | 1.25E-04 | TE                                      |
| AT4G08430 | 2692.75  | 88.55   | 30.32 | 3.91E-05 | Ulp1 protease family protein            |
| AT4G08593 | 40229.78 | 862.74  | 46.48 | 3.63E-05 | Unknown                                 |
| AT4G08691 | 10277.38 | 280.05  | 36.80 | 3.70E-05 | Unknown                                 |
| AT4G08710 | 8711.06  | 495.61  | 14.41 | 2.15E-06 | TE                                      |
| AT4G08720 | 3100.19  | 261.04  | 11.69 | 5.12E-05 | TE                                      |
| AT4G08860 | 1058.66  | 88.48   | 11.84 | 2.59E-04 | TE                                      |
| AT4G09880 | 654.96   | 68.46   | 11.10 | 7.44E-06 | Unknown                                 |
| AT4G10655 | 6486.82  | 207.35  | 30.47 | 3.86E-05 | Defensin-like family protein            |
| AT4G10910 | 10743.77 | 1425.68 | 11.36 | 3.24E-03 | Unknown                                 |
| AT4G10920 | 14833.58 | 2635.59 | 5.71  | 4.02E-04 | KELP                                    |
| AT4G11890 | 3201.09  | 523.57  | 5.98  | 2.76E-02 | Protein kinase family protein           |
| AT4G13890 | 798.88   | 126.58  | 5.86  | 2.36E-05 | EDA36                                   |
| AT4G15242 | 6791.81  | 199.06  | 34.12 | 3.77E-05 | ncRNA                                   |
| AT4G15417 | 1907.60  | 448.46  | 7.08  | 1.22E-02 | ATRTL1                                  |
| AT4G16215 | 30458.87 | 1228.52 | 24.94 | 4.05E-05 | Unknown                                 |
| AT4G17585 | 596.14   | 39.21   | 16.34 | 2.19E-06 | Unknown                                 |
| AT4G17587 | 285.71   | 21.18   | 11.43 | 9.70E-05 | TE                                      |
| AT4G18150 | 175.17   | 10.82   | 11.35 | 8.21E-03 | Unknown                                 |
| AT4G18410 | 2776.47  | 152.12  | 17.63 | 4.45E-05 | TE                                      |
| AT4G19240 | 613.28   | 26.71   | 23.69 | 5.58E-05 | Unknown                                 |
| AT4G22170 | 124.73   | 11.98   | 7.78  | 3.63E-03 | F-box family protein                    |
| AT4G24610 | 1419.52  | 72.63   | 13.24 | 3.03E-04 | Unknown                                 |
| AT4G24644 | 33019.03 | 1112.02 | 28.42 | 3.93E-05 | Unknown                                 |
| AT4G25530 | 5514.40  | 172.42  | 31.82 | 3.82E-05 | FWA                                     |
| AT4G26390 | 496.33   | 57.63   | 10.00 | 7.66E-06 | Putative pyruvate kinase                |
| AT4G28420 | 1082.67  | 241.51  | 8.15  | 3.56E-02 | Putative aminotransferase               |
| AT4G29200 | 10534.38 | 228.80  | 46.34 | 3.58E-05 | Beta-galactosidase                      |
| AT4G30040 | 1684.37  | 142.59  | 12.42 | 7.61E-04 | Aspartyl protease family                |
| AT4G30640 | 549.12   | 228.28  | 5.40  | 3.95E-02 | FBL19                                   |
| AT4G34180 | 12487.96 | 2029.91 | 6.15  | 5.53E-06 | Cyclase family protein                  |
| AT4G34680 | 234.63   | 40.31   | 5.72  | 1.79E-02 | Putative GATA transcription factor<br>3 |
| AT4G34690 | 195.71   | 12.60   | 10.76 | 3.54E-03 | Unknown                                 |
| AT4G39404 | 3131.77  | 352.53  | 7.83  | 6.55E-05 | ncRNA                                   |
| AT4G40080 | 5257.93  | 453.85  | 13.92 | 1.03E-05 | ENTH domain-containing protein          |
| AT5G01080 | 5214.58  | 231.60  | 23.45 | 4.09E-05 | Beta-galactosidase                      |
| AT5G01400 | 10466.70 | 632.79  | 16.10 | 4.53E-05 | ESP4                                    |
| AT5G03090 | 26613.24 | 691.40  | 38.64 | 3.69E-05 | Unknown                                 |
| AT5G05870 | 40434.88 | 3065.78 | 14.47 | 1.93E-06 | UGT76C1                                 |
| AT5G06320 | 3766.37  | 783.45  | 5.27  | 1.55E-02 | NHL3                                    |

|           |          |         |       |          |                                  |
|-----------|----------|---------|-------|----------|----------------------------------|
| AT5G07570 | 489.99   | 23.03   | 8.42  | 2.79E-02 | Glycine/proline-rich protein     |
| AT5G07572 | 729.82   | 69.97   | 5.97  | 1.65E-02 | Unknown                          |
| AT5G07620 | 162.22   | 22.82   | 6.03  | 2.35E-03 | Protein kinase family protein    |
| AT5G10760 | 2161.50  | 303.22  | 7.78  | 2.36E-03 | Aspartyl protease family protein |
| AT5G14460 | 41039.54 | 2952.26 | 13.88 | 4.94E-05 | Pseudogene                       |
| AT5G15110 | 1299.12  | 38.69   | 37.62 | 1.82E-06 | Lyase/ pectate lyase             |
| AT5G15360 | 17633.74 | 568.57  | 31.96 | 3.83E-05 | Unknown                          |
| AT5G15420 | 4654.29  | 100.81  | 45.22 | 3.63E-05 | Unknown                          |
| AT5G15690 | 6230.23  | 234.77  | 26.64 | 3.95E-05 | Unknown                          |
| AT5G16500 | 221.57   | 39.37   | 6.05  | 6.44E-04 | Protein kinase family protein    |
| AT5G22570 | 803.60   | 125.25  | 5.02  | 2.28E-02 | WRKY38                           |
| AT5G24240 | 10119.06 | 636.27  | 18.25 | 1.52E-06 | PI3- and 4-kinase family protein |
| AT5G24250 | 1649.33  | 75.88   | 23.76 | 4.32E-05 | Unknown                          |
| AT5G24480 | 2165.30  | 224.33  | 8.92  | 6.17E-06 | Beta-galactosidase               |
| AT5G25955 | 13008.88 | 542.53  | 23.44 | 4.06E-05 | TE                               |
| AT5G26170 | 4315.39  | 726.15  | 5.63  | 1.12E-02 | WRKY50                           |
| AT5G26270 | 44130.70 | 1950.85 | 24.85 | 4.15E-05 | Unknown                          |
| AT5G26970 | 8749.04  | 1112.03 | 8.53  | 2.54E-06 | Unknown                          |
| AT5G27170 | 5224.63  | 181.22  | 28.24 | 3.92E-05 | Unknown                          |
| AT5G27340 | 166.11   | 16.74   | 11.47 | 1.49E-03 | Unknown                          |
| AT5G27345 | 3019.25  | 189.11  | 14.83 | 3.69E-04 | TE                               |
| AT5G27927 | 2290.78  | 117.12  | 19.08 | 4.42E-05 | SADHU5-2 TE                      |
| AT5G27960 | 198.84   | 18.77   | 9.75  | 4.37E-04 | AGL90                            |
| AT5G28085 | 185.62   | 24.50   | 8.10  | 1.10E-02 | TE                               |
| AT5G28090 | 2358.08  | 83.22   | 27.22 | 4.02E-05 | Unknown                          |
| AT5G28100 | 1781.57  | 88.05   | 20.86 | 4.99E-05 | TE                               |
| AT5G28200 | 1117.25  | 33.37   | 31.86 | 3.15E-05 | TE                               |
| AT5G28232 | 1788.46  | 152.77  | 11.52 | 5.35E-05 | TE                               |
| AT5G28235 | 642.97   | 16.58   | 36.91 | 5.16E-05 | Ulp1 protease family protein     |
| AT5G28360 | 16002.32 | 2219.90 | 6.49  | 1.03E-03 | ACS3                             |
| AT5G28464 | 2609.04  | 73.51   | 34.73 | 3.83E-05 | TE                               |
| AT5G28526 | 15427.30 | 432.94  | 35.63 | 3.74E-05 | TE                               |
| AT5G28560 | 1529.40  | 104.92  | 14.10 | 1.82E-06 | Unknown                          |
| AT5G28696 | 310.35   | 22.31   | 16.64 | 8.13E-05 | TE                               |
| AT5G28760 | 1630.09  | 82.00   | 18.72 | 4.71E-05 | TE                               |
| AT5G28810 | 293.84   | 23.21   | 16.44 | 2.06E-04 | Unknown                          |
| AT5G28824 | 86.77    | 10.71   | 7.73  | 1.76E-03 | ncRNA                            |
| AT5G28880 | 7756.46  | 245.41  | 26.95 | 4.12E-05 | TE                               |
| AT5G28888 | 4315.68  | 330.44  | 10.98 | 4.62E-04 | TE                               |
| AT5G28890 | 115.43   | 12.94   | 6.60  | 5.19E-03 | TE                               |
| AT5G28927 | 2387.03  | 284.36  | 8.28  | 6.55E-05 | TE                               |
| AT5G29020 | 166.53   | 13.47   | 7.05  | 4.70E-02 | TE                               |
| AT5G29026 | 138.40   | 10.58   | 10.58 | 1.22E-03 | TE                               |
| AT5G29028 | 540.01   | 46.08   | 10.00 | 7.61E-06 | TE                               |
| AT5G29034 | 252.04   | 12.45   | 16.34 | 1.04E-04 | TE                               |
| AT5G29035 | 1235.87  | 132.46  | 8.47  | 3.22E-06 | TE                               |
| AT5G29050 | 5106.51  | 87.43   | 54.55 | 3.55E-05 | Unknown                          |
| AT5G29337 | 118.74   | 12.44   | 8.76  | 9.63E-04 | TE                               |

|           |          |         |       |          |                            |
|-----------|----------|---------|-------|----------|----------------------------|
| AT5G29560 | 458.00   | 10.36   | 39.89 | 4.76E-06 | Calcium ion binding        |
| AT5G29720 | 613.29   | 16.80   | 37.71 | 3.68E-06 | TE                         |
| AT5G29807 | 832.25   | 32.47   | 25.27 | 4.63E-05 | Unknown                    |
| AT5G30341 | 13626.37 | 966.54  | 13.76 | 4.76E-05 | Unknown                    |
| AT5G30400 | 1346.89  | 76.06   | 16.18 | 5.17E-05 | TE                         |
| AT5G30450 | 1018.44  | 128.76  | 7.77  | 7.04E-05 | TE                         |
| AT5G30520 | 169.34   | 26.49   | 6.77  | 7.47E-04 | Unknown                    |
| AT5G31685 | 214.74   | 16.89   | 13.99 | 1.28E-04 | TE                         |
| AT5G31702 | 743.00   | 47.36   | 19.78 | 1.24E-05 | TE                         |
| AT5G31758 | 721.31   | 57.38   | 13.07 | 5.53E-05 | TE                         |
| AT5G31821 | 2235.80  | 85.77   | 25.52 | 4.16E-05 | TE                         |
| AT5G32487 | 1153.66  | 30.34   | 40.95 | 4.09E-05 | TE                         |
| AT5G32580 | 698.24   | 64.45   | 9.51  | 9.36E-05 | TE                         |
| AT5G32590 | 221.34   | 14.52   | 14.53 | 1.78E-04 | Myosin heavy chain-related |
| AT5G32620 | 730.53   | 47.72   | 12.21 | 4.53E-03 | TE                         |
| AT5G32623 | 2879.77  | 66.00   | 39.75 | 2.70E-05 | TE                         |
| AT5G32627 | 163.41   | 15.55   | 9.81  | 7.48E-05 | TE                         |
| AT5G32654 | 120.87   | 10.25   | 10.44 | 5.04E-04 | TE                         |
| AT5G33226 | 279.59   | 15.78   | 17.59 | 1.27E-05 | TE                         |
| AT5G33250 | 1383.99  | 42.29   | 33.14 | 4.05E-05 | TE                         |
| AT5G33251 | 39285.11 | 1441.64 | 27.76 | 3.99E-05 | Pseudogene                 |
| AT5G33393 | 302.58   | 17.64   | 15.23 | 3.37E-05 | Unknown                    |
| AT5G33404 | 1049.02  | 28.10   | 36.73 | 4.63E-05 | TE                         |
| AT5G33898 | 1211.56  | 75.33   | 16.00 | 6.71E-06 | Unknown                    |
| AT5G34501 | 1192.66  | 84.70   | 13.30 | 1.74E-04 | TE                         |
| AT5G34665 | 196.02   | 33.47   | 5.33  | 3.54E-03 | TE                         |
| AT5G34829 | 98.48    | 14.71   | 6.91  | 1.31E-03 | Unknown                    |
| AT5G34845 | 111.55   | 10.00   | 10.72 | 8.23E-04 | TE                         |
| AT5G34869 | 5863.09  | 204.89  | 28.71 | 3.89E-05 | Unknown                    |
| AT5G34920 | 271.00   | 27.78   | 10.96 | 7.26E-04 | TE                         |
| AT5G35048 | 145.61   | 19.18   | 7.69  | 5.91E-04 | TE                         |
| AT5G35069 | 4189.89  | 257.16  | 15.80 | 4.57E-05 | Unknown                    |
| AT5G35070 | 572.60   | 27.09   | 22.51 | 3.61E-04 | Pseudogene                 |
| AT5G35120 | 6722.43  | 660.62  | 9.76  | 2.48E-06 | Unknown                    |
| AT5G35205 | 10494.96 | 588.93  | 17.94 | 4.34E-05 | TE                         |
| AT5G35375 | 1897.82  | 159.05  | 11.99 | 5.40E-05 | Unknown                    |
| AT5G35416 | 1773.43  | 76.89   | 23.49 | 4.24E-05 | TE                         |
| AT5G35490 | 27295.20 | 4748.18 | 5.72  | 5.12E-06 | ATMRU1                     |
| AT5G35535 | 743.13   | 46.82   | 12.68 | 2.34E-04 | TE                         |
| AT5G35760 | 144.13   | 17.94   | 8.41  | 6.64E-04 | Beta-galactosidase         |
| AT5G35798 | 5620.30  | 120.95  | 44.51 | 3.64E-05 | TE                         |
| AT5G35800 | 608.25   | 29.38   | 18.28 | 3.93E-05 | TE                         |
| AT5G35870 | 969.53   | 194.38  | 6.06  | 5.24E-04 | Unknown                    |
| AT5G35890 | 847.17   | 28.38   | 27.04 | 7.89E-05 | Beta-galactosidase         |
| AT5G35917 | 10931.47 | 678.76  | 16.93 | 1.87E-06 | CYP79A3P                   |
| AT5G35918 | 4106.63  | 245.97  | 15.21 | 1.84E-06 | TE                         |
| AT5G35920 | 4520.76  | 224.16  | 19.32 | 1.42E-05 | CYP79A4P                   |
| AT5G36140 | 1408.82  | 176.38  | 6.75  | 1.85E-05 | CYP716A2                   |

|           |          |         |       |          |                                         |
|-----------|----------|---------|-------|----------|-----------------------------------------|
| AT5G36900 | 10530.13 | 340.36  | 30.06 | 3.83E-05 | Unknown                                 |
| AT5G37200 | 357.80   | 10.83   | 28.08 | 1.52E-05 | Zinc finger family protein              |
| AT5G37280 | 2868.36  | 102.35  | 26.59 | 4.03E-05 | Zinc finger family protein              |
| AT5G38190 | 2097.61  | 118.06  | 17.19 | 4.53E-05 | Myosin heavy chain-related              |
| AT5G39270 | 1367.92  | 21.09   | 65.55 | 3.56E-05 | ATEXPA22                                |
| AT5G40605 | 267.81   | 10.57   | 23.31 | 1.35E-04 | TE                                      |
| AT5G41280 | 190.71   | 19.19   | 6.39  | 1.94E-02 | Unknown                                 |
| AT5G41660 | 9975.79  | 533.76  | 18.84 | 4.25E-05 | Unknown                                 |
| AT5G41830 | 3297.11  | 127.33  | 27.16 | 3.97E-05 | F-box family protein-related            |
| AT5G43630 | 44145.99 | 7690.27 | 5.65  | 8.74E-05 | TZP                                     |
| AT5G44585 | 22486.11 | 4792.33 | 8.15  | 1.64E-02 | Unknown                                 |
| AT5G45095 | 6150.39  | 456.01  | 14.38 | 3.33E-04 | Unknown                                 |
| AT5G45576 | 1774.05  | 166.75  | 10.82 | 5.42E-05 | TE                                      |
| AT5G45890 | 1851.26  | 98.00   | 17.99 | 4.53E-05 | SAG12                                   |
| AT5G46295 | 2866.25  | 489.79  | 6.66  | 2.10E-03 | Unknown                                 |
| AT5G46795 | 441.07   | 33.68   | 13.11 | 1.20E-02 | MSP2                                    |
| AT5G49250 | 787.43   | 28.36   | 31.00 | 3.95E-06 | Beta-galactosidase                      |
| AT5G49465 | 5642.54  | 513.16  | 11.02 | 2.96E-06 | TE                                      |
| AT5G52340 | 27389.77 | 1047.44 | 26.55 | 3.99E-05 | ATEXO70A2 A2)                           |
| AT5G52750 | 4755.29  | 659.32  | 6.51  | 2.24E-02 | Heavy metal transport superfamily       |
| AT5G52760 | 4673.28  | 725.75  | 6.17  | 4.78E-02 | Heavy metal transport superfamily       |
| AT5G54700 | 87.67    | 13.62   | 5.51  | 1.09E-03 | Ankyrin repeat family protein           |
| AT5G57735 | 424.74   | 16.29   | 16.95 | 1.73E-03 | ncRNA                                   |
| AT5G59620 | 350.35   | 24.47   | 17.93 | 1.15E-03 | TE                                      |
| AT5G63225 | 1152.76  | 147.62  | 9.71  | 1.63E-02 | Glycosyl hydrolase family protein<br>17 |
| AT5G65300 | 41301.20 | 4493.33 | 9.49  | 6.00E-05 | Unknown                                 |
| AT5G66380 | 866.56   | 147.32  | 5.26  | 4.57E-04 | ATFOLT1                                 |

---



**Supplemental Table 2. ncRNAs upregulated in the *vim1/2/3* mutant.**

ncRNA genes that were transcriptionally upregulated in *vim1/2/3* compared with wild-type (WT) plants (fold-change  $\geq 5.0$ ,  $p < 0.05$ ) are listed.

| Gene             | <i>vim1/2/3</i> /WT | p-value  | Signal intensity in WT | TE existence * |
|------------------|---------------------|----------|------------------------|----------------|
| <i>AT1G26558</i> | 5.04                | 3.00E-03 | 89.12                  | Y              |
| <i>AT1G67105</i> | 14.50               | 1.80E-06 | 3413.92                | Y              |
| <i>AT2G05995</i> | 8.46                | 5.00E-03 | 2271.97                | Y              |
| <i>AT2G06002</i> | 12.08               | 3.54E-05 | 3061.08                | Y              |
| <i>AT2G06562</i> | 41.27               | 3.66E-05 | 794.81                 | Y              |
| <i>AT2G07213</i> | 35.12               | 3.80E-05 | 83.23                  | Y              |
| <i>AT2G15555</i> | 18.08               | 1.49E-03 | 3152.07                | Y              |
| <i>AT3G24518</i> | 42.65               | 3.63E-05 | 151.39                 | N              |
| <i>AT4G04077</i> | 18.97               | 5.59E-04 | 118.41                 | Y              |
| <i>AT4G15242</i> | 34.12               | 3.77E-05 | 199.06                 | N              |
| <i>AT4G39404</i> | 7.83                | 6.55E-05 | 352.53                 | N              |
| <i>AT5G28824</i> | 7.73                | 2.00E-03 | 10.71                  | Y              |
| <i>AT5G57735</i> | 16.95               | 2.00E-03 | 16.29                  | Y              |

\* Y, at least one TE was positioned proximately to or inside of the gene; N, no TE was positioned proximately to or inside of the gene.

**Supplemental Table 3. Genes for known function or genes similar to known proteins upregulated in *vim1/2/3*.**

Genes that were transcriptionally upregulated in *vim1/2/3* compared with wild-type (WT) plants (fold-change  $\geq 5.0$ ,  $p < 0.05$ ) are listed.

| Gene             | <i>vim1/2/3</i><br>/<br>WT | p-value  | Description                    | Signal<br>intensity in<br>WT | Expression<br>pattern in WT<br>(Genevestigator) |
|------------------|----------------------------|----------|--------------------------------|------------------------------|-------------------------------------------------|
| <i>AT1G01530</i> | 9.60                       | 3.08E-04 | AGL28                          | 18.12                        | Endosperm                                       |
| <i>AT1G02580</i> | 17.12                      | 6.10E-03 | MEA                            | 156.78                       | Endosperm                                       |
| <i>AT1G02920</i> | 5.32                       | 3.42E-03 | ATGSTF7                        | 153.31                       |                                                 |
| <i>AT1G02930</i> | 5.48                       | 2.06E-02 | ATGSTF6                        | 2603.43                      |                                                 |
| <i>AT1G10710</i> | 5.19                       | 2.13E-05 | PHS1                           | 451.13                       |                                                 |
| <i>AT1G18130</i> | 37.59                      | 3.73E-05 | Class II aaRS synthetases      | 329.90                       |                                                 |
| <i>AT1G20795</i> | 6.39                       | 4.27E-02 | F-box family protein           | 13.76                        | N.D.                                            |
| <i>AT1G22590</i> | 8.08                       | 6.21E-05 | AGL87                          | 828.14                       | Endosperm                                       |
| <i>AT1G24110</i> | 6.95                       | 7.08E-05 | Putative peroxidase            | 3183.81                      | Stamen                                          |
| <i>AT1G28000</i> | 11.42                      | 1.72E-04 | PPR superfamily protein        | 228.15                       | N.D.                                            |
| <i>AT1G30810</i> | 5.95                       | 8.39E-05 | Transcription factor           | 7286.37                      | Ubiquitous                                      |
| <i>AT1G32010</i> | 19.17                      | 1.06E-05 | Myosin heavy chain-related     | 79.95                        |                                                 |
| <i>AT1G34810</i> | 18.51                      | 6.07E-04 | Plant thionin family protein   | 17.20                        | N.D.                                            |
| <i>AT1G34860</i> | 6.21                       | 6.83E-04 | Plant thionin family protein   | 17.70                        | N.D.                                            |
| <i>AT1G36100</i> | 19.00                      | 1.74E-03 | Myosin heavy chain-related     | 22.44                        |                                                 |
| <i>AT1G37000</i> | 5.05                       | 6.27E-03 | $\beta$ -galactosidase-related | 12.86                        |                                                 |
| <i>AT1G42680</i> | 6.71                       | 7.47E-05 | Myosin-related                 | 217.43                       |                                                 |
| <i>AT1G47350</i> | 15.54                      | 2.91E-06 | F-box family protein-related   | 39.32                        |                                                 |
| <i>AT1G49715</i> | 5.69                       | 3.57E-03 | DEFL family protein            | 10.13                        | N.D.                                            |
| <i>AT1G52460</i> | 9.01                       | 2.72E-06 | Hydrolase                      | 210.43                       | Seed                                            |
| <i>AT1G53490</i> | 23.24                      | 4.16E-05 | DNA binding                    | 1656.01                      | Endosperm                                       |
| <i>AT1G53480</i> | 30.32                      | 3.86E-05 | MRD1                           | 917.20                       | N.D.                                            |
| <i>AT1G57670</i> | 19.84                      | 7.72E-05 | TIR domain-containing protein  | 20.84                        | Root                                            |
| <i>AT1G60570</i> | 8.80                       | 6.19E-05 | F-box family protein           | 4487.29                      | Endosperm, Cell culture                         |
| <i>AT1G64790</i> | 22.75                      | 4.09E-05 | ILA                            | 589.99                       |                                                 |
| <i>AT1G72060</i> | 6.53                       | 4.83E-03 | Endopeptidase inhibitor        | 974.60                       |                                                 |
| <i>AT1G73603</i> | 23.66                      | 1.68E-06 | LCR64                          | 42.92                        | N.D.                                            |
| <i>AT1G73607</i> | 17.19                      | 1.45E-04 | LCR65                          | 14.28                        | N.D.                                            |
| <i>AT1G79100</i> | 6.40                       | 3.79E-03 | Arg/Ser-rich protein-related   | 11.75                        |                                                 |
| <i>AT2G02030</i> | 10.14                      | 3.35E-04 | F-box family protein           | 14.96                        | N.D.                                            |
| <i>AT2G03720</i> | 17.34                      | 1.26E-05 | MRH6                           | 490.46                       | Root                                            |
| <i>AT2G04020</i> | 6.58                       | 2.35E-03 | GDSL-motif lipase family       | 86.63                        | Stamen                                          |
| <i>AT2G04031</i> | 11.47                      | 5.24E-05 | ECA1 gametogenesis related     | 232.83                       | N.D.                                            |

|                  |       |           |                                 |         |                    |
|------------------|-------|-----------|---------------------------------|---------|--------------------|
| <i>AT2G10550</i> | 10.08 | 5.81E-04  | Uracil DNA glycosylase family   | 32.59   | N.D.               |
| <i>AT2G13980</i> | 21.53 | 4.47E-05  | Nucleic acid binding            | 61.86   | N.D.               |
| <i>AT2G14560</i> | 5.63  | 2.74E-02  | LURP1                           | 2367.81 |                    |
| <i>AT2G14610</i> | 8.05  | 4.02E-03  | PR1                             | 1071.75 |                    |
| <i>AT2G16050</i> | 11.88 | 2.80E-05  | Cys/His-rich C1 domain family   | 2189.97 | N.D.               |
| <i>AT2G17690</i> | 33.87 | 7.44E-04  | SDC                             | 371.63  | N.D.               |
| <i>AT2G18540</i> | 10.53 | 5.64E-05  | Cupin family protein            | 4220.12 | Endosperm          |
| <i>AT2G18570</i> | 5.62  | 7.10E-06  | UDP-glucosyl transferase        | 1112.63 |                    |
| <i>AT2G18660</i> | 6.24  | 3.61E-02  | EXLB3                           | 2131.70 |                    |
| <i>AT2G19010</i> | 10.14 | 6.75E-04  | GDSL-motif lipase family        | 28.37   | Stamen             |
| <i>AT2G32510</i> | 9.54  | 1.40E-05  | MAPKKK17                        | 4246.57 | Seed, cell culture |
| <i>AT2G36710</i> | 7.52  | 1.75E-02  | Pectinesterase family protein   | 109.41  | Silique            |
| <i>AT2G45580</i> | 5.10  | 3.24E-03  | CYP76C3                         | 71.90   | Petal              |
| <i>AT3G01830</i> | 5.10  | 6.97E-03  | Putative calmodulin-related     | 664.29  | Cell culture       |
| <i>AT3G02100</i> | 9.49  | 6.78E-04  | UDP-glucosyl transferase        | 391.18  |                    |
| <i>AT3G03400</i> | 8.08  | 9.80E-06  | Putative calmodulin-related     | 87.88   | Endosperm          |
| <i>AT3G09800</i> | 12.54 | 1.69E-05  | SNARE-like superfamily          | 107.87  |                    |
| <i>AT3G10510</i> | 8.07  | 6.60E-05  | F-box family protein            | 5089.81 | N.D.               |
| <i>AT3G10595</i> | 7.77  | 9.69E-03  | Myb family transcription factor | 46.40   | N.D.               |
| <i>AT3G11080</i> | 5.85  | 1.02E-03  | AtRLP35                         | 130.89  |                    |
| <i>AT3G16100</i> | 6.31  | 3.92E-05  | ATRABG3C                        | 4268.40 |                    |
| <i>AT3G18720</i> | 8.06  | 8.27E-04  | F-box family protein            | 49.30   | Cell culture       |
| <i>AT3G19020</i> | 5.95  | 5.05E-04  | Leucine-rich repeat family      | 1281.97 | Stamen             |
| <i>AT3G20950</i> | 25.31 | 4.18E-05  | CYP705A32                       | 72.42   | Endosperm          |
| <i>AT3G21450</i> | 8.58  | 1.19E-05  | Protein kinase family protein   | 63.52   | N.D.               |
| <i>AT3G23060</i> | 5.80  | 3.21E-02  | Zinc finger family protein      | 21.55   | Endosperm          |
| <i>AT3G24542</i> | 22.41 | 4.32E-05  | $\beta$ -galactosidase-related  | 73.15   | N.D.               |
| <i>AT3G30720</i> | 9.24  | 4.07E-06  | QQS                             | 854.06  |                    |
| <i>AT3G43580</i> | 11.07 | 3.66E-05  | $\beta$ -galactosidase-related  | 197.93  | N.D.               |
| <i>AT3G44070</i> | 28.98 | 4.03E-05  | $\beta$ -galactosidase-related  | 42.68   | Stamen             |
| <i>AT3G44790</i> | 12.22 | 5.27E-05  | MATH domain-containing          | 153.27  | N.D.               |
| <i>AT3G45510</i> | 6.37  | 2.96E-03  | Zinc finger family protein      | 10.55   |                    |
| <i>AT3G48130</i> | 9.44  | 2.68E-04  | RSU1                            | 900.86  | Cell culture       |
| <i>AT3G49850</i> | 5.78  | 3.823e-03 | TRB3                            | 1756.24 |                    |
| <i>AT3G53910</i> | 37.21 | 3.80E-05  | Malate dehydrogenase-related    | 56.15   |                    |
| <i>AT3G56630</i> | 7.13  | 6.75E-05  | CYP94D2                         | 1025.40 |                    |
| <i>AT3G60260</i> | 6.57  | 7.72E-05  | ELMO1-related                   | 5736.53 |                    |
| <i>AT3G60870</i> | 7.48  | 6.93E-05  | DNA-binding protein-related     | 334.94  | N.D.               |
| <i>AT4G00700</i> | 5.06  | 4.69E-02  | C2 domain-containing protein    | 687.29  |                    |
| <i>AT4G02380</i> | 5.62  | 8.50E-03  | SAG21                           | 5900.49 |                    |
| <i>AT4G03156</i> | 10.68 | 5.79E-05  | Small GTPase-related            | 124.88  | Endosperm          |
| <i>AT4G03950</i> | 14.86 | 2.23E-04  | Putative G6P translocator       | 16.99   |                    |
| <i>AT4G04500</i> | 5.22  | 2.16E-02  | Protein kinase family protein   | 14.47   |                    |

|                  |       |          |                                  |         |              |
|------------------|-------|----------|----------------------------------|---------|--------------|
| <i>AT4G08039</i> | 7.31  | 9.05E-04 | DEFL family protein              | 51.10   | N.D.         |
| <i>AT4G08430</i> | 30.32 | 3.91E-05 | Ulp1 protease family protein     | 88.55   |              |
| <i>AT4G10655</i> | 30.47 | 3.86E-05 | DEFL family protein              | 207.35  | N.D.         |
| <i>AT4G10920</i> | 5.71  | 4.02E-04 | KELP                             | 2635.59 |              |
| <i>AT4G11890</i> | 5.98  | 2.76E-02 | Protein kinase family protein    | 523.57  |              |
| <i>AT4G13890</i> | 5.86  | 2.36E-05 | EDA36                            | 126.58  |              |
| <i>AT4G15417</i> | 7.08  | 1.22E-02 | ATRTL1                           | 448.46  | N.D.         |
| <i>AT4G22170</i> | 7.78  | 3.63E-03 | F-box family protein             | 11.98   | N.D.         |
| <i>AT4G25530</i> | 31.82 | 3.82E-05 | FWA                              | 172.42  | Endosperm    |
| <i>AT4G26390</i> | 10.00 | 7.66E-06 | Putative pyruvate kinase         | 57.63   | Cell culture |
| <i>AT4G28420</i> | 8.15  | 3.56E-02 | Putative aminotransferase        | 241.51  |              |
| <i>AT4G29200</i> | 46.34 | 3.58E-05 | $\beta$ -galactosidase-related   | 228.80  | Root         |
| <i>AT4G30040</i> | 12.42 | 7.61E-04 | Aspartyl protease family         | 142.59  |              |
| <i>AT4G30640</i> | 5.40  | 3.95E-02 | FBL19                            | 228.28  |              |
| <i>AT4G34180</i> | 6.15  | 5.53E-06 | Cyclase family protein           | 2029.91 |              |
| <i>AT4G34680</i> | 5.72  | 1.78E-02 | GATA transcription factor 3      | 40.31   |              |
| <i>AT4G40080</i> | 13.92 | 1.03E-05 | ENTH domain-containing           | 453.85  | Root         |
| <i>AT5G01080</i> | 23.45 | 4.09E-05 | $\beta$ -galactosidase-related   | 231.60  |              |
| <i>AT5G01400</i> | 16.10 | 4.53E-05 | ESP4                             | 632.79  |              |
| <i>AT5G05870</i> | 14.47 | 1.93E-06 | UGT76C1                          | 3065.78 |              |
| <i>AT5G06320</i> | 5.27  | 1.55E-02 | NHL3                             | 783.45  |              |
| <i>AT5G07570</i> | 8.42  | 2.79E-02 | Glycine/proline-rich protein     | 23.03   |              |
| <i>AT5G07620</i> | 6.03  | 2.35E-03 | Protein kinase family protein    | 22.82   |              |
| <i>AT5G10760</i> | 7.78  | 2.36E-03 | Aspartyl protease family protein | 303.22  |              |
| <i>AT5G15110</i> | 37.62 | 1.82E-06 | Lyase/pectate lyase              | 38.69   | Stamen       |
| <i>AT5G16500</i> | 6.05  | 6.44E-04 | Protein kinase family protein    | 39.37   | Stamen       |
| <i>AT5G22570</i> | 5.02  | 2.28E-02 | WRKY38                           | 125.25  |              |
| <i>AT5G24240</i> | 18.25 | 1.52E-06 | PI3- and 4-kinase family         | 636.27  | Stamen       |
| <i>AT5G24480</i> | 8.92  | 6.17E-06 | $\beta$ -galactosidase-related   | 224.33  | Shoot apex   |
| <i>AT5G26170</i> | 5.63  | 1.12E-02 | WRKY50                           | 726.15  | N.D.         |
| <i>AT5G27960</i> | 9.75  | 4.37E-04 | AGL90                            | 18.77   | Endosperm    |
| <i>AT5G28235</i> | 36.91 | 5.16E-05 | Ulp1 protease family protein     | 16.58   | N.D.         |
| <i>AT5G28360</i> | 6.49  | 1.03E-03 | ACS3                             | 2219.90 |              |
| <i>AT5G29560</i> | 39.89 | 4.76E-06 | Calcium ion binding              | 10.36   | N.D.         |
| <i>AT5G32590</i> | 14.53 | 1.78E-04 | Myosin heavy chain-related       | 14.52   |              |
| <i>AT5G35490</i> | 5.72  | 5.12E-06 | ATMRU1                           | 4748.18 |              |
| <i>AT5G35760</i> | 8.41  | 6.64E-04 | $\beta$ -galactosidase-related   | 17.94   |              |
| <i>AT5G35890</i> | 27.04 | 7.89E-05 | $\beta$ -galactosidase-related   | 28.38   |              |
| <i>AT5G35917</i> | 16.93 | 1.87E-06 | CYP79A3P                         | 678.76  | N.D.         |
| <i>AT5G35920</i> | 19.32 | 1.42E-05 | CYP79A4P                         | 224.16  |              |
| <i>AT5G36140</i> | 6.75  | 1.85E-05 | CYP716A2                         | 176.38  | Root         |
| <i>AT5G37200</i> | 28.08 | 1.52E-05 | Zinc finger family protein       | 10.83   | N.D.         |
| <i>AT5G37280</i> | 26.59 | 4.03E-05 | Zinc finger family protein       | 102.35  |              |

|                  |       |          |                                |         |                |
|------------------|-------|----------|--------------------------------|---------|----------------|
| <i>AT5G38190</i> | 17.19 | 4.53E-05 | Myosin heavy chain-related     | 118.06  |                |
| <i>AT5G39270</i> | 65.55 | 3.56E-05 | ATEXPA22                       | 21.09   | Endoseprm      |
| <i>AT5G41830</i> | 27.16 | 3.97E-05 | F-box family protein-related   | 127.33  | Embryo         |
| <i>AT5G43630</i> | 5.65  | 8.74E-05 | TZP                            | 7690.27 | N.D.           |
| <i>AT5G45890</i> | 17.99 | 4.53E-05 | SAG12                          | 98.00   | Senescing leaf |
| <i>AT5G46795</i> | 13.11 | 1.20E-02 | MSP2                           | 33.68   | Stamen         |
| <i>AT5G49250</i> | 31.00 | 3.95E-06 | $\beta$ -galactosidase-related | 28.36   |                |
| <i>AT5G52340</i> | 26.55 | 3.99E-05 | ATEXO70A2                      | 1047.44 | Cell culture   |
| <i>AT5G52750</i> | 6.51  | 2.24E-02 | Heavy-metal-associated domain  | 659.32  |                |
| <i>AT5G52760</i> | 6.17  | 4.78E-02 | Heavy-metal-associated domain  | 725.75  |                |
| <i>AT5G54700</i> | 5.51  | 1.09E-03 | Ankyrin repeat family protein  | 13.62   |                |
| <i>AT5G63225</i> | 9.71  | 1.63E-02 | Glycosyl hydrolase family      | 147.62  | N.D.           |
| <i>AT5G66380</i> | 5.26  | 4.57E-04 | ATFOLT1                        | 147.32  |                |

---

**Supplemental Table 4. AGI annotated genes downregulated in *vim1/2/3*.**

The AGI genes whose transcripts were decreased in *vim1/2/3* compared with wild-type (WT) plants (fold-change  $\leq 0.2$ ,  $p < 0.05$ ) are listed.

| Gene      | <i>vim1,2,3</i><br>intensity | WT<br>intensity | <i>vim1/2/3</i><br>/<br>WT | p-value  | Gene_Name                                 |
|-----------|------------------------------|-----------------|----------------------------|----------|-------------------------------------------|
| AT1G05550 | 68.06                        | 333.63          | 0.18                       | 8.39E-03 | Unknown                                   |
| AT1G19500 | 105.00                       | 550.90          | 0.14                       | 1.20E-02 | Unknown                                   |
| AT1G20480 | 70.05                        | 271.81          | 0.19                       | 2.25E-02 | 4-coumarate--CoA ligase family            |
| AT1G21980 | 255.44                       | 1394.18         | 0.18                       | 1.56E-03 | ATPIP5K1                                  |
| AT1G23940 | 20.90                        | 142.05          | 0.14                       | 1.25E-04 | Adaptin family protein                    |
| AT1G26310 | 19.64                        | 103.21          | 0.19                       | 1.23E-03 | CAL                                       |
| AT1G26790 | 890.59                       | 5036.02         | 0.16                       | 1.09E-02 | Zinc finger domain-containing protein     |
| AT1G29610 | 221.50                       | 2066.55         | 0.10                       | 5.71E-05 | Unknown                                   |
| AT1G47655 | 115.76                       | 790.80          | 0.14                       | 7.97E-05 | Zinc finger domain-containing protein     |
| AT1G47840 | 773.19                       | 2492.97         | 0.19                       | 4.04E-02 | HXK3                                      |
| AT1G52000 | 153.33                       | 1543.26         | 0.08                       | 9.41E-04 | Jacalin lectin family protein             |
| AT1G58430 | 17.71                        | 155.92          | 0.17                       | 2.62E-02 | RXF26; carboxylesterase/ hydrolase        |
| AT1G58520 | 16.95                        | 120.73          | 0.15                       | 1.89E-04 | RXW8                                      |
| AT1G59406 | 33.35                        | 168.56          | 0.17                       | 3.10E-03 | Putative GDSL-motif lipase                |
| AT1G61270 | 13.74                        | 111.33          | 0.14                       | 1.89E-04 | Putative Lys and His-specific transporter |
| AT1G62230 | 13.65                        | 85.37           | 0.18                       | 2.44E-03 | Pseudogene                                |
| AT1G66100 | 4103.39                      | 29874.67        | 0.14                       | 3.15E-03 | Putative thionin                          |
| AT1G68540 | 133.21                       | 756.71          | 0.18                       | 1.92E-05 | Oxidoreductase family protein             |
| AT1G77870 | 292.25                       | 2374.74         | 0.12                       | 2.86E-05 | MUB5                                      |
| AT1G77880 | 196.80                       | 1116.10         | 0.19                       | 1.04E-02 | F-box family protein                      |
| AT2G04110 | 3476.19                      | 33132.05        | 0.10                       | 5.28E-05 | Pseudogene                                |
| AT2G13550 | 787.63                       | 8044.10         | 0.10                       | 5.46E-05 | Unknown                                   |
| AT2G15128 | 735.59                       | 4572.39         | 0.16                       | 7.62E-05 | ncRNA                                     |
| AT2G16367 | 3302.59                      | 23244.44        | 0.16                       | 2.41E-02 | DEFL family protein                       |
| AT2G20870 | 256.11                       | 1841.60         | 0.14                       | 5.84E-06 | Putative cell wall protein precursor      |
| AT2G28180 | 47.29                        | 261.08          | 0.15                       | 2.35E-02 | ATCHX8                                    |
| AT2G36490 | 142.24                       | 2598.14         | 0.05                       | 1.11E-05 | DML1                                      |
| AT2G37555 | 13.94                        | 99.12           | 0.20                       | 2.91E-02 | ncRNA                                     |
| AT2G39950 | 138.70                       | 804.11          | 0.16                       | 1.41E-05 | Unknown                                   |
| AT2G45540 | 658.07                       | 4175.13         | 0.13                       | 2.17E-03 | WD-40 repeat family protein               |
| AT2G46375 | 115.03                       | 505.97          | 0.16                       | 1.42E-02 | Unknown                                   |
| AT3G03840 | 13.28                        | 70.02           | 0.20                       | 2.30E-03 | Putative auxin-responsive protein         |
| AT3G06435 | 700.65                       | 5045.30         | 0.13                       | 5.47E-06 | Unknown                                   |
| AT3G07610 | 285.35                       | 1755.54         | 0.16                       | 7.15E-05 | IBM1                                      |
| AT3G09160 | 728.85                       | 4967.44         | 0.15                       | 4.20E-06 | RRM-containing protein                    |
| AT3G12460 | 15.74                        | 100.09          | 0.17                       | 3.34E-04 | Polynucleotidyl transferase               |

|           |         |          |      |          |                                           |
|-----------|---------|----------|------|----------|-------------------------------------------|
| AT3G16120 | 472.71  | 2956.60  | 0.18 | 1.98E-03 | Putative dynein light chain               |
| AT3G21020 | 67.97   | 575.94   | 0.14 | 3.79E-03 | TE                                        |
| AT3G25795 | 129.29  | 622.29   | 0.17 | 2.16E-02 | ncRNA                                     |
| AT3G46490 | 104.35  | 1182.98  | 0.09 | 5.57E-05 | Fe(II)-dependent oxygenase superfamily    |
| AT3G62570 | 233.07  | 989.65   | 0.18 | 2.56E-03 | TPR-like superfamily protein              |
| AT4G03298 | 26.67   | 232.18   | 0.13 | 2.01E-02 | Unknown                                   |
| AT4G03935 | 358.27  | 2135.43  | 0.18 | 5.33E-05 | ncRNA                                     |
| AT4G06701 | 90.24   | 858.78   | 0.12 | 2.74E-04 | ncRNA                                     |
| AT4G08570 | 298.31  | 1894.32  | 0.18 | 2.86E-04 | Heavy metal transport superfamily protein |
| AT4G08874 | 85.75   | 404.37   | 0.18 | 4.42E-04 | Unknown                                   |
| AT4G09430 | 32.15   | 239.58   | 0.16 | 1.06E-04 | Putative TIR-NBS-LRR class protein        |
| AT4G13690 | 61.04   | 617.99   | 0.10 | 4.55E-02 | Unknown                                   |
| AT4G15200 | 25.56   | 339.11   | 0.10 | 7.98E-03 | Actin binding                             |
| AT4G25010 | 110.21  | 446.03   | 0.15 | 1.90E-02 | Nodulin MtN3 family protein               |
| AT4G33790 | 573.62  | 3228.48  | 0.17 | 3.90E-03 | CER4                                      |
| AT5G03250 | 25.48   | 133.26   | 0.19 | 6.04E-04 | NPH3 family protein                       |
| AT5G10140 | 32.34   | 171.98   | 0.19 | 1.46E-04 | FLC                                       |
| AT5G15800 | 78.49   | 418.56   | 0.20 | 1.13E-02 | SEP1                                      |
| AT5G20240 | 170.29  | 1078.50  | 0.10 | 1.52E-02 | PI                                        |
| AT5G22430 | 54.74   | 736.57   | 0.07 | 1.02E-05 | Unknown                                   |
| AT5G23970 | 13.58   | 105.55   | 0.19 | 3.46E-02 | Transferase family protein                |
| AT5G24770 | 4205.83 | 29227.68 | 0.13 | 3.80E-03 | VSP2                                      |
| AT5G24780 | 833.38  | 6905.88  | 0.11 | 4.56E-04 | VSP1                                      |
| AT5G28440 | 1097.59 | 5668.56  | 0.19 | 3.54E-05 | Unknown                                   |
| AT5G38120 | 186.61  | 1120.24  | 0.15 | 2.79E-03 | 4-coumarate--CoA ligase family protein    |
| AT5G39190 | 3943.27 | 22899.74 | 0.19 | 3.51E-05 | GER2                                      |
| AT5G49615 | 137.63  | 587.36   | 0.18 | 3.84E-02 | ncRNA                                     |
| AT5G57420 | 116.27  | 650.79   | 0.12 | 5.58E-03 | IAA33                                     |
| AT5G59100 | 60.06   | 249.65   | 0.20 | 2.03E-02 | Subtilase family protein                  |
| AT5G59130 | 89.63   | 413.68   | 0.16 | 4.33E-02 | Subtilase family protein                  |
| AT5G60142 | 45.08   | 266.23   | 0.18 | 6.01E-03 | DNA binding                               |
| AT5G60910 | 34.06   | 193.72   | 0.16 | 2.42E-03 | AGL8                                      |
| AT5G62080 | 38.62   | 722.68   | 0.11 | 4.72E-02 | Protease inhibitor family protein         |

---

**Supplemental Table 5. Putative  $\beta$ -galactosidase genes upregulated in *vim1/2/3*.**

$\beta$ -galactosidase genes that were transcriptionally upregulated in *vim1/2/3* compared with wild-type type (WT) plants (fold-change  $\geq 5.0$ ,  $p < 0.05$ ) are listed.

| Gene             | <i>vim1/2/3</i> /WT | p-value  | Signal intensity in WT | TE existence* |
|------------------|---------------------|----------|------------------------|---------------|
| <i>AT1G37000</i> | 5.05                | 6.27E-03 | 12.86                  | Y             |
| <i>AT3G24542</i> | 22.41               | 4.32E-05 | 73.15                  | N             |
| <i>AT3G43580</i> | 11.07               | 3.66E-05 | 197.93                 | Y             |
| <i>AT3G44070</i> | 28.98               | 4.03E-05 | 42.68                  | Y             |
| <i>AT4G29200</i> | 46.34               | 3.58E-05 | 228.80                 | N             |
| <i>AT5G01080</i> | 23.45               | 4.09E-05 | 231.60                 | N             |
| <i>AT5G24480</i> | 8.92                | 6.17E-06 | 224.33                 | Y             |
| <i>AT5G35760</i> | 8.41                | 1.00E-03 | 17.94                  | Y             |
| <i>AT5G35890</i> | 27.04               | 7.89E-05 | 28.38                  | Y             |
| <i>AT5G49250</i> | 31.00               | 3.95E-06 | 28.36                  | Y             |

\* Y, at least one TE was positioned proximately to or inside of the gene; N, no TE was positioned proximately to or inside of the gene.



**Supplemental Table 6. Oligonucleotide primers used in this study**

| Name           | Sequence (5'→3')                | Description          |
|----------------|---------------------------------|----------------------|
| AT1G47350-F    | TGT TTC GGT AGT TGG AGT GA      | RT-PCR, qRT-PCR      |
| AT1G47350-R1   | TTC GTC GTG GTC TGA TTG TT      | RT-PCR               |
| AT1G47350-R2   | TTC TAC GCT TTA GCA GAC CA      | qRT-PCR              |
| AT1G47350BI-F1 | TTC TCA CTC TAA TCT CTC TC      | Bisulfite sequencing |
| AT1G47350BI-R1 | TAA AYG TGA GTA GTA GGT AG      | Bisulfite sequencing |
| AT1G47350BI-F2 | ATY GAA AAT AAT GGY TTG TGA AG  | Bisulfite sequencing |
| AT1G47350BI-R2 | CAC ATC AAA RCA AAC TAC CAC     | Bisulfite sequencing |
| AT1G47350IP-F1 | TTC TCA CTC TAA TCT CTC TC      | ChIP-qPCR            |
| AT1G47350IP-R1 | AGT TCG GTA ATT TCG GTG TT      | ChIP-qPCR            |
| AT1G47350IP-F2 | AGA GGA TGA TTA CGA TGG AG      | ChIP-qPCR            |
| AT1G47350IP-R2 | GTC AAT CGG ATC ATA CCC GA      | ChIP-qPCR            |
| AT2G06562-F1   | ATC GAA TTC TGA TGC GTC GA      | RT-PCR, qRT-PCR      |
| AT2G06562-R1   | GTA CTT CAG CAG CTG ACG GA      | RT-PCR               |
| AT2G06562-F2   | ATC GAA TTC TGA TGC GTC GA      | qRT-PCR              |
| AT2G06562BI-F1 | GTT GTT GAG ATY GTA TAT ATT TYA | Bisulfite sequencing |
| AT2G06562BI-R1 | AAT TTG AGC CCT CTT GTC TAC AAC | Bisulfite sequencing |
| AT2G06562BI-F2 | CCC RCC ATC ATC RAT TCA TCA A   | Bisulfite sequencing |
| AT2G06562BI-R2 | GGG GAA TTT GGG GAT GYA TAG A   | Bisulfite sequencing |
| AT2G06562IP-F1 | AGT GTT GGC TTC TCT GTT ACC TCA | ChIP-qPCR            |
| AT2G06562IP-R1 | GTA GAT CAA GGG AAA ATC TCC     | ChIP-qPCR            |
| AT2G06562IP-F2 | AGC ACT TAT GTT ATG CAC GG      | ChIP-qPCR            |
| AT2G06562IP-R2 | GGG AAT TTG GGG ATG CAT AG      | ChIP-qPCR            |
| AT3G44070-F1   | ACC GTA ACT TCC TCG ACC TC      | RT-PCR               |
| AT3G44070-R1   | AGA CGA AGT GGC GTT GGT GT      | RT-PCR, ChIP-qPCR    |
| AT3G44070-F2   | GCT TTA TTA CCC GAC ATT TAC G   | qRT-PCR              |
| AT3G44070-R2   | GCG AAT GGA AGT AGT GTA GAG     | qRT-PCR              |
| AT3G44070BI-F1 | CRT TCA TTR ARA CCC ACC CCT TTA | Bisulfite sequencing |
| AT3G44070BI-R1 | GGG ATA TGG AGA TAA GAG GTY GAG | Bisulfite sequencing |
| AT3G44070BI-F2 | RAC TAC CTT TCA TCA ARC TCT CTA | Bisulfite sequencing |
| AT3G44070BI-R2 | AYA AAG ATG GAG GGG AAA TGA ATT | Bisulfite sequencing |
| AT3G44070IP-F1 | TTC ATT GAG ACC CAC CCC TT      | ChIP-qPCR            |
| AT3G44070IP-R1 | TTG GTT CCA TAG ATC GAC AC      | ChIP-qPCR            |
| AT3G44070IP-F2 | ATC GGA GTA CCG TCT TTG CT      | ChIP-qPCR            |
| AT3G53910-F1   | CCC ATA CGC TAT GAT ATC GT      | RT-PCR               |

|                |                                    |                      |
|----------------|------------------------------------|----------------------|
| AT3G53910-R1   | GCA ACA AAA GTC CTC TGT AG         | RT-PCR               |
| AT3G53910-F2   | AGA GAA TTG AGG AAG TGA TAG ATT    | qRT-PCR, ChIP-qPCR   |
| AT3G53910-R2   | TCT GTA GCA AAG TGA TGT CTT        | qRT-PCR, ChIP-qPCR   |
| AT3G53910BI-F1 | AAC CAC CTA ACR ACA ACT CC         | Bisulfite sequencing |
| AT3G53910BI-R1 | GAG GAY AAA GAY GAG AAG GA         | Bisulfite sequencing |
| AT3G53910BI-F2 | GGG TTG GAA GTG AAT YGG ATG ATA    | Bisulfite sequencing |
| AT3G53910BI-R2 | ACA ACA CAC ATA RTT CCA TRT CTT    | Bisulfite sequencing |
| AT3G53910IP-F1 | AAC CAC CTA ACG ACA ACT CC         | ChIP-qPCR            |
| AT3G53910IP-R1 | CTT CGC AAA AGG TAA TCG GA         | ChIP-qPCR            |
| ESP4-F1        | CAG CCA GCC AGA GAT TCA ATC TTC    | RT-PCR               |
| ESP4-R1        | AGA CTG GCC AGT ACC AAT AGG ACT    | RT-PCR, qRT-PCR      |
| ESP4-F2        | GAG TCA GTC TCA GAA CAG TC         | qRT-PCR              |
| ESP4BI-F1      | CCC ACA TCR RCC CAT TAT TAC T      | Bisulfite sequencing |
| ESP4BI-R1      | TGA TTT GGY GGA ATT YGY GAG A      | Bisulfite sequencing |
| ESP4BI-F2      | GAT GGT GTA TTY TYY ATG GAG        | Bisulfite sequencing |
| ESP4BI-R2      | TTC TCT TCC ACT RAT ACC TR         | Bisulfite sequencing |
| ESP4IP-F1      | CCC ACA TCG GCC CAT TAT TA         | ChIP-qPCR            |
| ESP4IP-R1      | GTT ACA CTA CGT CGT TTG GA         | ChIP-qPCR            |
| ESP4IP-F2      | TTC AGG ACA AAG ACA GTG TAG AAG    | ChIP-qPCR            |
| ESP4IP-R2      | TTC TCT TCC ACT GAT ACC TG         | ChIP-qPCR            |
| MSP2-F1        | ACC TTC CGA AAT GGA AAG ACG AAA    | RT-PCR               |
| MSP2-R1        | GCA GCC CAA TAA GCT AAA ACG AGA    | RT-PCR               |
| MSP2-F2        | TCC TTT TCA TGT CCC CTT AC         | qRT-PCR              |
| MSP2-R2        | CTC CAG TAA TGG CTT CTC TAC        | qRT-PCR              |
| MSP2BI-F1      | GGT TTA TAA ATT GGA GTT AAT ATT TA | Bisulfite sequencing |
| MSP2BI-R1      | CAA TTT ACA ACR AAA TCC AAR TRT TC | Bisulfite sequencing |
| MSP2BI-F2      | ATG GAG AYG ATT GAG YAA CAA        | Bisulfite sequencing |
| MSP2BI-R2      | TTC ACC ARA CCC TCC ART TRA A      | Bisulfite sequencing |
| MSP2IP-F1      | GGT TTA TAA ATT GGA GTT AAT A      | ChIP-qPCR            |
| MSP2IP-R1      | TTT CCT GTT GAC ACT CTC TA         | ChIP-qPCR            |
| MSP2IP-F2      | ACC TTC CGA AAT GGA AAG ACG AAA    | ChIP-qPCR            |
| MSP2IP-R2      | GCG ATT CGA TCT AGT AAC GA         | ChIP-qPCR            |
| QQS-F1         | CCT CTC ATT ACC TCT CAT CAA ACA    | RT-PCR               |
| QQS-R1         | ACC CAT GAT ATG ACC CTC ATT TTG    | RT-PCR               |
| QQS-F2         | CCT TAT TTC TCG CTT TGT CT         | qRT-PCR              |
| QQS-R2         | AGA ACC AAA CAC CAA CTG GT         | qRT-PCR, ChIP-qPCR   |
| QQSBI-F1       | TCT RTA CCC AAA CCT TAT CCC        | Bisulfite sequencing |
| QQSBI-R1       | GAT GTA GAA GTG TGA GGY AAA        | Bisulfite sequencing |
| QQSBI-F2       | AGG TTA TAG AAG ATY TGG GTT G      | Bisulfite sequencing |

|              |                                 |                      |
|--------------|---------------------------------|----------------------|
| QQSBI-R2     | CCT TTC AAT RTC CAT CAA ATT C   | Bisulfite sequencing |
| QQSIP-F1     | TCT GTA CCC AAA CCT TAT CCC     | ChIP-qPCR            |
| QQSIP-R1     | ACC TGT GGA GAA AAT GAA GC      | ChIP-qPCR            |
| QQSIP-F2     | AGG TTA TAG AAG ATC TGG GTT G   | ChIP-qPCR            |
| AT4G08430-F1 | AGA ATG CAA GCA GCA GAT TG      | RT-PCR               |
| AT4G08430-R1 | CCT TTA CAG CTG TCT TCT TC      | RT-PCR               |
| AT4G08430-F2 | TCA CAA TTA GTG ACA TGG AC      | qRT-PCR              |
| AT4G08430-R2 | GCT TCA TTG CAT ACT ACA AG      | qRT-PCR              |
| AT4G15242-F1 | ATC TAG AGA TTC TGC GAT CTG     | RT-PCR, qRT-PCR      |
| AT4G15242-R1 | TCT GAT GTG GTT GAG CTT AG      | RT-PCR               |
| AT4G15242-R2 | AGC ACT ACA AGC TAC ACC TA      | qRT-PCR              |
| AT5G35890-F1 | GGT TAT GGA CTC CGC TTA AGC CAT | RT-PCR, qRT-PCR      |
| AT5G35890-R1 | AAT GCT ACG GAG CCG ACT GGT ACC | RT-PCR               |
| AT5G35890-R2 | CAC CAA GTC CAT TAG CCT AAA GC  | qRT-PCR              |
| AGL90-F1     | ACC CAT CTT ATG GAG AGG AT      | RT-PCR               |
| AGL90-R1     | TCA TAT TCG CAT TTG CGT CC      | RT-PCR, qRT-PCR      |
| AGL90-F2     | TCG TTT TCC GAC TCT CCT AT      | qRT-PCR              |
| CYP79A4P-F1  | TGT CCA CTA CTG ATG TTG TG      | RT-PCR, qRT-PCR      |
| CYP79A4P-R1  | GAT CAC TCT TGC TTA CTG AA      | RT-PCR               |
| CYP79A4P -R2 | CAG GAT CAA ACT TAA GCG GT      | qRT-PCR              |
| CYP705A32-F1 | GTT CAA GAA ACC GAT CTA CC      | RT-PCR               |
| CYP705A32-R1 | AGC AGC CTC GTT CAT GTT TA      | RT-PCR, qRT-PCR      |
| CYP705A32-F2 | TAC ATG CCT TTC TCA ACT GG      | qRT-PCR              |
| ACT2-F1      | TTC CGC TCT TTC TTT CCA AGC TCA | RT-PCR               |
| ACT2-R1      | AAG AGG CAT CAA TTC GAT CAC TCA | RT-PCR               |
| ACT2-F2      | TCC CTC AGC ACA TTC CAG CAG AT  | qRT-PCR              |
| ACT2-R2      | AAC GAT TCC TGG ACC TGC CTC ATC | qRT-PCR              |
| UBQ10-F1     | TGT TTA GTG CAG TTC TGC GAA AC  | qRT-PCR              |
| UBQ10-R1     | CAG CTC AAC ACT TTC GCT ACA TCT | qRT-PCR              |

---
